# Supplementary material
Source: publisher figshare collection journal article supplement (https://acs.figshare.com/ndownloader/files/4533526)
Supplement: Supplementary file 1 [file 4533526]

data_global 

_publ_contact_author_name  'Prof. Cameron J. Kepert' 

_publ_contact_author_address     
; 
School of Chemistry
University of Sydney
NSW 2006
Australia
;
_publ_contact_author_email       c.kepert@chem.usyd.edu.au
_publ_contact_author_phone       +61-2-9351-5741
_publ_contact_author_fax         +61-2-9351-3329
_publ_requested_journal          'J. Am. Chem. Soc.'
_publ_section_title
; 
 Dynamic Interplay between Spin-Crossover and Host-Guest 
 Function in a Nanoporous Metal-Organic Framework Material.
;

loop_
_publ_author_name
_publ_author_address
'Southon, Peter D.'
;
School of Chemistry
University of Sydney
NSW 2006
Australia   
;
'Liu, Lang'
;
School of Chemistry
University of Sydney
NSW 2006
Australia   
;
'Fellows, Elizabeth A.'
;
School of Chemistry
University of Sydney
NSW 2006
Australia   
;
'Price, David J.'
;
School of Chemistry
University of Sydney
NSW 2006
Australia   
;
'Halder, Gregory J.'
;
Materials Science Division
Argonne National Laboratory
Argonne, IL 60439
USA
;
'Chapman, Karena W.'
;
X-ray Science Division
Argonne National Laboratory
Argonne, IL 60439
USA
;
'Moubaraki, Boujemaa'
;
School of Chemistry
Monash University
VIC 3800
Australia   
;
'Murray, Keith S.'
;
School of Chemistry
Monash University
VIC 3800
Australia   
;
'Letard, Jean-Francois'
;
ICMCB
UPR 9048 CNRS-Universite de Bourdeaux
F33608
Pessac
France   
;
'Kepert, Cameron J.'
;
School of Chemistry
University of Sydney
NSW 2006
Australia   
;

#=END

 
data_1.2H2O(150) 

_audit_creation_method            SHELXL-97 
_chemical_name_systematic 
; 
 ? 
; 
_chemical_name_common             '[Fe(pz)Ni(CN)4].2H2O' 
_chemical_melting_point           ? 
_chemical_formula_moiety          'C8 H8 Fe N6 Ni O2' 
_chemical_formula_sum 
 'C8 H8 Fe N6 Ni O2' 
_chemical_formula_weight          334.76 
  
loop_ 
 _atom_type_symbol 
 _atom_type_description 
 _atom_type_scat_dispersion_real 
 _atom_type_scat_dispersion_imag 
 _atom_type_scat_source 
 'C'  'C'   0.0033   0.0016 
 'International Tables Vol C Tables 4.2.6.8 and 6.1.1.4' 
 'H'  'H'   0.0000   0.0000 
 'International Tables Vol C Tables 4.2.6.8 and 6.1.1.4' 
 'N'  'N'   0.0061   0.0033 
 'International Tables Vol C Tables 4.2.6.8 and 6.1.1.4' 
 'O'  'O'   0.0106   0.0060 
 'International Tables Vol C Tables 4.2.6.8 and 6.1.1.4' 
 'Fe'  'Fe'   0.3463   0.8444 
 'International Tables Vol C Tables 4.2.6.8 and 6.1.1.4' 
 'Ni'  'Ni'   0.3393   1.1124 
 'International Tables Vol C Tables 4.2.6.8 and 6.1.1.4' 
  
_symmetry_cell_setting            Orthorhombic 
_symmetry_space_group_name_H-M    Pmmm 
  
loop_ 
 _symmetry_equiv_pos_as_xyz 
 'x, y, z' 
 '-x, -y, z' 
 'x, -y, -z' 
 '-x, y, -z' 
 '-x, -y, -z' 
 'x, y, -z' 
 '-x, y, z' 
 'x, -y, z' 
  
_cell_length_a                    7.1139(3) 
_cell_length_b                    6.9109(4) 
_cell_length_c                    6.7799(3) 
_cell_angle_alpha                 90.00 
_cell_angle_beta                  90.00 
_cell_angle_gamma                 90.00 
_cell_volume                      333.32(3) 
_cell_formula_units_Z             1 
_cell_measurement_temperature     150(2) 
_cell_measurement_reflns_used     1415 
_cell_measurement_theta_min       2.8635 
_cell_measurement_theta_max       29.922 
  
_exptl_crystal_description        'rectangular block' 
_exptl_crystal_colour             'red-yellow' 
_exptl_crystal_size_max           0.071 
_exptl_crystal_size_mid           0.024 
_exptl_crystal_size_min           0.024 
_exptl_crystal_density_meas       ? 
_exptl_crystal_density_diffrn     1.668 
_exptl_crystal_density_method     'not measured' 
_exptl_crystal_F_000              168 
_exptl_absorpt_coefficient_mu     2.502 
_exptl_absorpt_correction_type    'multi-scan' 
_exptl_absorpt_correction_T_min   0.837 
_exptl_absorpt_correction_T_max   0.942 
_exptl_absorpt_process_details    'SADABS (Bruker-AXS, 2004)' 
  
_exptl_special_details 
; 
 In a thin film of Paratone N oil on a mohair fibre 
; 
  
_diffrn_ambient_temperature       150(2) 
_diffrn_radiation_wavelength      0.71073 
_diffrn_radiation_type            MoK\a 
_diffrn_radiation_source          'fine-focus rotating anode' 
_diffrn_radiation_monochromator   graphite 
_diffrn_measurement_device_type   'Bruker-Nonius FR591 Kappa APEX II' 
_diffrn_measurement_method        'phi and omega scans' 
_diffrn_detector_area_resol_mean  ? 
_diffrn_standards_number          0 
_diffrn_standards_interval_count  ? 
_diffrn_standards_interval_time   ? 
_diffrn_standards_decay_%         ? 
_diffrn_reflns_number             2462 
_diffrn_reflns_av_R_equivalents   0.0117 
_diffrn_reflns_av_sigmaI/netI     0.0118 
_diffrn_reflns_limit_h_min        -9 
_diffrn_reflns_limit_h_max        9 
_diffrn_reflns_limit_k_min        -9 
_diffrn_reflns_limit_k_max        3 
_diffrn_reflns_limit_l_min        -9 
_diffrn_reflns_limit_l_max        9 
_diffrn_reflns_theta_min          2.86 
_diffrn_reflns_theta_max          29.92 
_reflns_number_total              586 
_reflns_number_gt                 507 
_reflns_threshold_expression      >2sigma(I) 
  
_computing_data_collection        'APEX2 Ver. 2.1-3 (Bruker-AXS, 2007)' 
_computing_cell_refinement        'SAINT Ver. 7.23A  (Bruker-AXS, 2005)' 
_computing_data_reduction         'SAINT Ver. 7.23A' 
_computing_structure_solution     'SHELXS-97 (Sheldrick, 1990)' 
_computing_structure_refinement   'SHELXL-97 (Sheldrick, 1997)' 
_computing_molecular_graphics     'XPMA/ZORTEP, WebLab Viewer 3.7' 
_computing_publication_material   'CIFTAB'
 
  
_refine_special_details 
; 
 Refinement of F^2^ against ALL reflections.  The weighted R-factor wR and 
 goodness of fit S are based on F^2^, conventional R-factors R are based 
 on F, with F set to zero for negative F^2^. The threshold expression of 
 F^2^ > 2sigma(F^2^) is used only for calculating R-factors(gt) etc. and is 
 not relevant to the choice of reflections for refinement.  R-factors based 
 on F^2^ are statistically about twice as large as those based on F, and R- 
 factors based on ALL data will be even larger. 
; 
  
_refine_ls_structure_factor_coef  Fsqd 
_refine_ls_matrix_type            full 
_refine_ls_weighting_scheme       calc 
_refine_ls_weighting_details 
 'calc w=1/[\s^2^(Fo^2^)+(0.0446P)^2^+0.6984P] where P=(Fo^2^+2Fc^2^)/3' 
_atom_sites_solution_primary      direct 
_atom_sites_solution_secondary    difmap 
_atom_sites_solution_hydrogens    geom 
_refine_ls_hydrogen_treatment     constr 
_refine_ls_extinction_method      none 
_refine_ls_extinction_coef        ? 
_refine_ls_number_reflns          585 
_refine_ls_number_parameters      38 
_refine_ls_number_restraints      1 
_refine_ls_R_factor_all           0.0394 
_refine_ls_R_factor_gt            0.0334 
_refine_ls_wR_factor_ref          0.0936 
_refine_ls_wR_factor_gt           0.0885 
_refine_ls_goodness_of_fit_ref    1.118 
_refine_ls_restrained_S_all       1.117 
_refine_ls_shift/su_max           0.000 
_refine_ls_shift/su_mean          0.000 
  
loop_ 
 _atom_site_label 
 _atom_site_type_symbol 
 _atom_site_fract_x 
 _atom_site_fract_y 
 _atom_site_fract_z 
 _atom_site_U_iso_or_equiv 
 _atom_site_adp_type 
 _atom_site_occupancy 
 _atom_site_symmetry_multiplicity 
 _atom_site_calc_flag 
 _atom_site_refinement_flags 
 _atom_site_disorder_assembly 
 _atom_site_disorder_group 
Ni1 Ni 0.5000 0.5000 0.0000 0.0097(2) Uani 1 8 d S . . 
Fe1 Fe 0.0000 0.0000 0.0000 0.0086(2) Uani 1 8 d S . . 
O10 O 0.5000 0.203(2) 0.5000 0.059(3) Uiso 0.385(4) 4 d SP . . 
O11 O 0.5000 0.0000 0.417(4) 0.059(3) Uiso 0.215(10) 4 d SP . . 
O12 O 0.5000 0.413(5) 0.5000 0.059(3) Uiso 0.171(11) 4 d SP . . 
O13 O 0.344(4) 0.5000 0.5000 0.059(3) Uiso 0.228(10) 4 d SP . . 
N1 N 0.1948(3) 0.1973(4) 0.0000 0.0125(5) Uani 1 2 d S . . 
N2 N 0.0000 0.0000 0.2929(5) 0.0122(6) Uani 1 4 d S . . 
C1 C 0.3125(4) 0.3111(4) 0.0000 0.0125(5) Uani 1 2 d S . . 
C2 C 0.0000 0.1641(5) 0.3972(4) 0.0178(6) Uani 1 2 d S . . 
H2 H 0.0000 0.2843 0.3292 0.021 Uiso 1 2 calc SR . . 
  
loop_ 
 _atom_site_aniso_label 
 _atom_site_aniso_U_11 
 _atom_site_aniso_U_22 
 _atom_site_aniso_U_33 
 _atom_site_aniso_U_23 
 _atom_site_aniso_U_13 
 _atom_site_aniso_U_12 
Ni1 0.0081(3) 0.0072(3) 0.0138(3) 0.000 0.000 0.000 
Fe1 0.0081(4) 0.0078(4) 0.0097(4) 0.000 0.000 0.000 
N1 0.0116(10) 0.0126(11) 0.0134(9) 0.000 0.000 0.0004(9) 
N2 0.0122(13) 0.0127(15) 0.0118(14) 0.000 0.000 0.000 
C1 0.0122(11) 0.0114(12) 0.0141(11) 0.000 0.000 0.0022(10) 
C2 0.0236(13) 0.0143(13) 0.0155(13) -0.0003(11) 0.000 0.000 
  
_geom_special_details 
; 
 All esds (except the esd in the dihedral angle between two l.s. planes) 
 are estimated using the full covariance matrix.  The cell esds are taken 
 into account individually in the estimation of esds in distances, angles 
 and torsion angles; correlations between esds in cell parameters are only 
 used when they are defined by crystal symmetry.  An approximate (isotropic) 
 treatment of cell esds is used for estimating esds involving l.s. planes. 
; 
  
loop_ 
 _geom_bond_atom_site_label_1 
 _geom_bond_atom_site_label_2 
 _geom_bond_distance 
 _geom_bond_site_symmetry_2 
 _geom_bond_publ_flag 
Ni1 C1 1.866(3) 5_665 ? 
Ni1 C1 1.866(3) . ? 
Ni1 C1 1.866(3) 3_565 ? 
Ni1 C1 1.866(3) 7_655 ? 
Ni1 O12 3.443(6) 5_666 ? 
Ni1 O12 3.443(6) 1_554 ? 
Ni1 O12 3.443(6) . ? 
Ni1 O12 3.443(6) 5_665 ? 
Ni1 O13 3.566(8) 5_666 ? 
Ni1 O13 3.566(8) 1_554 ? 
Ni1 O13 3.566(8) . ? 
Ni1 O13 3.566(8) 5_665 ? 
Fe1 N1 1.944(3) . ? 
Fe1 N1 1.944(3) 5 ? 
Fe1 N1 1.944(3) 3 ? 
Fe1 N1 1.944(3) 7 ? 
Fe1 N2 1.986(3) 5 ? 
Fe1 N2 1.986(3) . ? 
Fe1 O11 4.544(15) 5 ? 
Fe1 O11 4.544(15) . ? 
Fe1 O11 4.544(15) 5_655 ? 
Fe1 O11 4.544(15) 1_455 ? 
O10 O12 1.45(4) . ? 
O10 O11 1.511(17) . ? 
O10 O11 1.511(17) 5_656 ? 
O10 O13 2.332(18) 5_666 ? 
O10 O13 2.332(18) . ? 
O10 O12 2.65(4) 5_666 ? 
O10 O10 2.81(3) 5_656 ? 
O10 C2 3.6345(13) . ? 
O10 C2 3.6345(13) 6_656 ? 
O10 C2 3.6345(13) 6_556 ? 
O10 C2 3.6345(13) 1_655 ? 
O10 C1 3.719(3) 7_656 ? 
O10 C1 3.719(3) . ? 
O10 C1 3.719(3) 1_556 ? 
O10 C1 3.719(3) 7_655 ? 
O10 Ni1 3.963(8) 1_556 ? 
O10 N1 4.0260(13) 7_656 ? 
O10 N1 4.0260(13) . ? 
O10 N1 4.0260(13) 7_655 ? 
O11 O11 1.12(5) 5_656 ? 
O11 O10 1.511(17) 5_656 ? 
O11 O12 2.91(3) . ? 
O11 O12 2.91(3) 5_656 ? 
O11 N2 3.655(6) . ? 
O11 N2 3.655(6) 1_655 ? 
O11 O13 3.672(9) 5_666 ? 
O11 O13 3.672(9) 1_545 ? 
O11 O13 3.672(9) . ? 
O11 O13 3.672(9) 5_656 ? 
O11 C2 3.7358(13) 2 ? 
O11 C2 3.7358(13) 1_655 ? 
O11 C2 3.7358(13) 2_655 ? 
O11 C2 3.7358(13) . ? 
O11 C1 3.795(19) 3 ? 
O11 C1 3.795(19) 5_655 ? 
O11 C1 3.795(19) . ? 
O11 C1 3.795(19) 7_655 ? 
O11 N1 3.817(19) 3 ? 
O12 O12 1.20(7) 5_666 ? 
O12 O13 1.26(3) 5_666 ? 
O12 O13 1.26(3) . ? 
O12 O10 2.65(4) 5_666 ? 
O12 O11 2.91(3) 5_656 ? 
O12 Ni1 3.443(6) 1_556 ? 
O12 C1 3.710(7) . ? 
O12 C1 3.710(7) 7_656 ? 
O12 C1 3.710(7) 7_655 ? 
O12 C1 3.710(7) 1_556 ? 
O12 C2 4.012(15) . ? 
O12 C2 4.012(15) 6_556 ? 
O12 C2 4.012(15) 6_656 ? 
O12 C2 4.012(15) 1_655 ? 
O12 O11 4.10(3) 5_666 ? 
O12 O11 4.10(3) 1_565 ? 
O12 C1 4.112(16) 5_666 ? 
O13 O12 1.26(3) 5_666 ? 
O13 O13 2.21(5) 5_666 ? 
O13 O10 2.332(18) 5_666 ? 
O13 C2 3.446(18) . ? 
O13 C2 3.446(18) 6_556 ? 
O13 C2 3.446(18) 5_566 ? 
O13 C2 3.446(18) 2_565 ? 
O13 Ni1 3.566(8) 1_556 ? 
O13 C1 3.6396(19) . ? 
O13 C1 3.6396(19) 3_566 ? 
O13 C1 3.6396(19) 3_565 ? 
O13 C1 3.6396(19) 1_556 ? 
O13 O11 3.672(9) 5_666 ? 
O13 O11 3.672(9) 1_565 ? 
O13 O11 3.672(9) 5_656 ? 
O13 N1 4.123(7) . ? 
N1 C1 1.149(4) . ? 
N1 O11 3.817(19) 5_655 ? 
N1 O10 4.0260(13) 1_554 ? 
N1 O13 4.123(7) 1_554 ? 
N2 C2 1.337(3) . ? 
N2 C2 1.337(3) 2 ? 
N2 O11 3.655(6) 1_455 ? 
N2 O11 4.064(12) 5_656 ? 
N2 O11 4.064(12) 5_556 ? 
N2 O10 4.073(6) 5_556 ? 
N2 O10 4.073(6) 5_656 ? 
N2 O10 4.073(6) 1_455 ? 
C1 O13 3.6396(19) 1_554 ? 
C1 O12 3.710(7) 1_554 ? 
C1 O10 3.719(3) 1_554 ? 
C1 O11 3.795(19) 5_655 ? 
C1 O12 4.112(16) 5_666 ? 
C1 O12 4.112(16) 5_665 ? 
C2 C2 1.394(6) 6_556 ? 
C2 O13 3.446(18) 5_566 ? 
C2 O10 3.6345(13) 1_455 ? 
C2 O11 3.7358(14) 1_455 ? 
C2 O11 3.940(8) 5_656 ? 
C2 O11 3.940(8) 5_556 ? 
C2 O12 4.012(15) 1_455 ? 
C2 H2 0.9500 . ? 
  
loop_ 
 _geom_angle_atom_site_label_1 
 _geom_angle_atom_site_label_2 
 _geom_angle_atom_site_label_3 
 _geom_angle 
 _geom_angle_site_symmetry_1 
 _geom_angle_site_symmetry_3 
 _geom_angle_publ_flag 
C1 Ni1 C1 180.0 5_665 . ? 
C1 Ni1 C1 91.25(17) 5_665 3_565 ? 
C1 Ni1 C1 88.75(17) . 3_565 ? 
C1 Ni1 C1 88.75(17) 5_665 7_655 ? 
C1 Ni1 C1 91.25(17) . 7_655 ? 
C1 Ni1 C1 180.0 3_565 7_655 ? 
C1 Ni1 O12 83.0(4) 5_665 5_666 ? 
C1 Ni1 O12 97.0(4) . 5_666 ? 
C1 Ni1 O12 83.0(4) 3_565 5_666 ? 
C1 Ni1 O12 97.0(4) 7_655 5_666 ? 
C1 Ni1 O12 97.0(4) 5_665 1_554 ? 
C1 Ni1 O12 83.0(4) . 1_554 ? 
C1 Ni1 O12 97.0(4) 3_565 1_554 ? 
C1 Ni1 O12 83.0(4) 7_655 1_554 ? 
O12 Ni1 O12 180.000(1) 5_666 1_554 ? 
C1 Ni1 O12 97.0(4) 5_665 . ? 
C1 Ni1 O12 83.0(4) . . ? 
C1 Ni1 O12 97.0(4) 3_565 . ? 
C1 Ni1 O12 83.0(4) 7_655 . ? 
O12 Ni1 O12 20.1(11) 5_666 . ? 
O12 Ni1 O12 159.9(11) 1_554 . ? 
C1 Ni1 O12 83.0(4) 5_665 5_665 ? 
C1 Ni1 O12 97.0(4) . 5_665 ? 
C1 Ni1 O12 83.0(4) 3_565 5_665 ? 
C1 Ni1 O12 97.0(4) 7_655 5_665 ? 
O12 Ni1 O12 159.9(11) 5_666 5_665 ? 
O12 Ni1 O12 20.1(11) 1_554 5_665 ? 
O12 Ni1 O12 180.0(11) . 5_665 ? 
C1 Ni1 O13 77.2(3) 5_665 5_666 ? 
C1 Ni1 O13 102.8(3) . 5_666 ? 
C1 Ni1 O13 102.8(3) 3_565 5_666 ? 
C1 Ni1 O13 77.2(3) 7_655 5_666 ? 
O12 Ni1 O13 20.6(4) 5_666 5_666 ? 
O12 Ni1 O13 159.4(4) 1_554 5_666 ? 
O12 Ni1 O13 20.6(4) . 5_666 ? 
O12 Ni1 O13 159.4(4) 5_665 5_666 ? 
C1 Ni1 O13 102.8(3) 5_665 1_554 ? 
C1 Ni1 O13 77.2(3) . 1_554 ? 
C1 Ni1 O13 77.2(3) 3_565 1_554 ? 
C1 Ni1 O13 102.8(3) 7_655 1_554 ? 
O12 Ni1 O13 159.4(4) 5_666 1_554 ? 
O12 Ni1 O13 20.6(4) 1_554 1_554 ? 
O12 Ni1 O13 159.4(4) . 1_554 ? 
O12 Ni1 O13 20.6(4) 5_665 1_554 ? 
O13 Ni1 O13 180.0 5_666 1_554 ? 
C1 Ni1 O13 102.8(3) 5_665 . ? 
C1 Ni1 O13 77.2(3) . . ? 
C1 Ni1 O13 77.2(3) 3_565 . ? 
C1 Ni1 O13 102.8(3) 7_655 . ? 
O12 Ni1 O13 20.6(4) 5_666 . ? 
O12 Ni1 O13 159.4(4) 1_554 . ? 
O12 Ni1 O13 20.6(4) . . ? 
O12 Ni1 O13 159.4(4) 5_665 . ? 
O13 Ni1 O13 36.2(8) 5_666 . ? 
O13 Ni1 O13 143.8(8) 1_554 . ? 
C1 Ni1 O13 77.2(3) 5_665 5_665 ? 
C1 Ni1 O13 102.8(3) . 5_665 ? 
C1 Ni1 O13 102.8(3) 3_565 5_665 ? 
C1 Ni1 O13 77.2(3) 7_655 5_665 ? 
O12 Ni1 O13 159.4(4) 5_666 5_665 ? 
O12 Ni1 O13 20.6(4) 1_554 5_665 ? 
O12 Ni1 O13 159.4(4) . 5_665 ? 
O12 Ni1 O13 20.6(4) 5_665 5_665 ? 
O13 Ni1 O13 143.8(8) 5_666 5_665 ? 
O13 Ni1 O13 36.2(8) 1_554 5_665 ? 
O13 Ni1 O13 180.0 . 5_665 ? 
N1 Fe1 N1 180.00(15) . 5 ? 
N1 Fe1 N1 89.09(14) . 3 ? 
N1 Fe1 N1 90.91(14) 5 3 ? 
N1 Fe1 N1 90.91(14) . 7 ? 
N1 Fe1 N1 89.09(14) 5 7 ? 
N1 Fe1 N1 180.00(10) 3 7 ? 
N1 Fe1 N2 90.0 . 5 ? 
N1 Fe1 N2 90.0 5 5 ? 
N1 Fe1 N2 90.0 3 5 ? 
N1 Fe1 N2 90.0 7 5 ? 
N1 Fe1 N2 90.0 . . ? 
N1 Fe1 N2 90.0 5 . ? 
N1 Fe1 N2 90.0 3 . ? 
N1 Fe1 N2 90.0 7 . ? 
N2 Fe1 N2 180.0 5 . ? 
N1 Fe1 O11 123.91(14) . 5 ? 
N1 Fe1 O11 56.09(14) 5 5 ? 
N1 Fe1 O11 123.91(14) 3 5 ? 
N1 Fe1 O11 56.09(14) 7 5 ? 
N2 Fe1 O11 51.5(2) 5 5 ? 
N2 Fe1 O11 128.5(2) . 5 ? 
N1 Fe1 O11 56.09(14) . . ? 
N1 Fe1 O11 123.91(14) 5 . ? 
N1 Fe1 O11 56.09(14) 3 . ? 
N1 Fe1 O11 123.91(14) 7 . ? 
N2 Fe1 O11 128.5(2) 5 . ? 
N2 Fe1 O11 51.5(2) . . ? 
O11 Fe1 O11 180.0(5) 5 . ? 
N1 Fe1 O11 56.09(14) . 5_655 ? 
N1 Fe1 O11 123.91(14) 5 5_655 ? 
N1 Fe1 O11 56.09(14) 3 5_655 ? 
N1 Fe1 O11 123.91(14) 7 5_655 ? 
N2 Fe1 O11 51.5(2) 5 5_655 ? 
N2 Fe1 O11 128.5(2) . 5_655 ? 
O11 Fe1 O11 103.0(5) 5 5_655 ? 
O11 Fe1 O11 77.0(5) . 5_655 ? 
N1 Fe1 O11 123.91(14) . 1_455 ? 
N1 Fe1 O11 56.09(14) 5 1_455 ? 
N1 Fe1 O11 123.91(14) 3 1_455 ? 
N1 Fe1 O11 56.09(14) 7 1_455 ? 
N2 Fe1 O11 128.5(2) 5 1_455 ? 
N2 Fe1 O11 51.5(2) . 1_455 ? 
O11 Fe1 O11 77.0(5) 5 1_455 ? 
O11 Fe1 O11 103.0(5) . 1_455 ? 
O11 Fe1 O11 180.0 5_655 1_455 ? 
O12 O10 O11 158.2(9) . . ? 
O12 O10 O11 158.2(9) . 5_656 ? 
O11 O10 O11 43.6(18) . 5_656 ? 
O12 O10 O13 28.3(6) . 5_666 ? 
O11 O10 O13 144.8(7) . 5_666 ? 
O11 O10 O13 144.8(7) 5_656 5_666 ? 
O12 O10 O13 28.3(6) . . ? 
O11 O10 O13 144.8(7) . . ? 
O11 O10 O13 144.8(7) 5_656 . ? 
O13 O10 O13 56.7(12) 5_666 . ? 
O12 O10 O12 0.000(6) . 5_666 ? 
O11 O10 O12 158.2(9) . 5_666 ? 
O11 O10 O12 158.2(9) 5_656 5_666 ? 
O13 O10 O12 28.3(6) 5_666 5_666 ? 
O13 O10 O12 28.3(6) . 5_666 ? 
O12 O10 O10 180.000(5) . 5_656 ? 
O11 O10 O10 21.8(9) . 5_656 ? 
O11 O10 O10 21.8(9) 5_656 5_656 ? 
O13 O10 O10 151.7(6) 5_666 5_656 ? 
O13 O10 O10 151.7(6) . 5_656 ? 
O12 O10 O10 180.000(3) 5_666 5_656 ? 
O12 O10 C2 94.2(3) . . ? 
O11 O10 C2 82.0(2) . . ? 
O11 O10 C2 90.1(3) 5_656 . ? 
O13 O10 C2 122.0(7) 5_666 . ? 
O13 O10 C2 66.5(5) . . ? 
O12 O10 C2 94.2(3) 5_666 . ? 
O10 O10 C2 85.8(3) 5_656 . ? 
O12 O10 C2 94.2(3) . 6_656 ? 
O11 O10 C2 90.1(3) . 6_656 ? 
O11 O10 C2 82.0(2) 5_656 6_656 ? 
O13 O10 C2 66.5(5) 5_666 6_656 ? 
O13 O10 C2 122.0(7) . 6_656 ? 
O12 O10 C2 94.2(3) 5_666 6_656 ? 
O10 O10 C2 85.8(3) 5_656 6_656 ? 
C2 O10 C2 171.5(5) . 6_656 ? 
O12 O10 C2 94.2(3) . 6_556 ? 
O11 O10 C2 90.1(3) . 6_556 ? 
O11 O10 C2 82.0(2) 5_656 6_556 ? 
O13 O10 C2 122.0(7) 5_666 6_556 ? 
O13 O10 C2 66.5(5) . 6_556 ? 
O12 O10 C2 94.2(3) 5_666 6_556 ? 
O10 O10 C2 85.8(3) 5_656 6_556 ? 
C2 O10 C2 22.11(9) . 6_556 ? 
C2 O10 C2 156.3(2) 6_656 6_556 ? 
O12 O10 C2 94.2(3) . 1_655 ? 
O11 O10 C2 82.0(2) . 1_655 ? 
O11 O10 C2 90.1(3) 5_656 1_655 ? 
O13 O10 C2 66.5(5) 5_666 1_655 ? 
O13 O10 C2 122.0(7) . 1_655 ? 
O12 O10 C2 94.2(3) 5_666 1_655 ? 
O10 O10 C2 85.8(3) 5_656 1_655 ? 
C2 O10 C2 156.3(2) . 1_655 ? 
C2 O10 C2 22.11(9) 6_656 1_655 ? 
C2 O10 C2 171.5(5) 6_556 1_655 ? 
O12 O10 C1 78.4(2) . 7_656 ? 
O11 O10 C1 121.7(9) . 7_656 ? 
O11 O10 C1 81.2(8) 5_656 7_656 ? 
O13 O10 C1 69.7(2) 5_666 7_656 ? 
O13 O10 C1 89.6(4) . 7_656 ? 
O12 O10 C1 78.4(2) 5_666 7_656 ? 
O10 O10 C1 101.6(2) 5_656 7_656 ? 
C2 O10 C1 122.73(8) . 7_656 ? 
C2 O10 C1 59.27(6) 6_656 7_656 ? 
C2 O10 C1 101.02(7) 6_556 7_656 ? 
C2 O10 C1 80.71(6) 1_655 7_656 ? 
O12 O10 C1 78.4(2) . . ? 
O11 O10 C1 81.2(8) . . ? 
O11 O10 C1 121.7(9) 5_656 . ? 
O13 O10 C1 89.6(4) 5_666 . ? 
O13 O10 C1 69.7(2) . . ? 
O12 O10 C1 78.4(2) 5_666 . ? 
O10 O10 C1 101.6(2) 5_656 . ? 
C2 O10 C1 59.27(6) . . ? 
C2 O10 C1 122.73(8) 6_656 . ? 
C2 O10 C1 80.71(6) 6_556 . ? 
C2 O10 C1 101.02(7) 1_655 . ? 
C1 O10 C1 156.8(5) 7_656 . ? 
O12 O10 C1 78.4(2) . 1_556 ? 
O11 O10 C1 121.7(9) . 1_556 ? 
O11 O10 C1 81.2(8) 5_656 1_556 ? 
O13 O10 C1 89.6(4) 5_666 1_556 ? 
O13 O10 C1 69.7(2) . 1_556 ? 
O12 O10 C1 78.4(2) 5_666 1_556 ? 
O10 O10 C1 101.6(2) 5_656 1_556 ? 
C2 O10 C1 80.71(6) . 1_556 ? 
C2 O10 C1 101.02(7) 6_656 1_556 ? 
C2 O10 C1 59.27(6) 6_556 1_556 ? 
C2 O10 C1 122.73(8) 1_655 1_556 ? 
C1 O10 C1 42.04(9) 7_656 1_556 ? 
C1 O10 C1 131.4(2) . 1_556 ? 
O12 O10 C1 78.4(2) . 7_655 ? 
O11 O10 C1 81.2(8) . 7_655 ? 
O11 O10 C1 121.7(9) 5_656 7_655 ? 
O13 O10 C1 69.7(2) 5_666 7_655 ? 
O13 O10 C1 89.6(4) . 7_655 ? 
O12 O10 C1 78.4(2) 5_666 7_655 ? 
O10 O10 C1 101.6(2) 5_656 7_655 ? 
C2 O10 C1 101.02(7) . 7_655 ? 
C2 O10 C1 80.71(6) 6_656 7_655 ? 
C2 O10 C1 122.73(8) 6_556 7_655 ? 
C2 O10 C1 59.27(6) 1_655 7_655 ? 
C1 O10 C1 131.4(2) 7_656 7_655 ? 
C1 O10 C1 42.04(9) . 7_655 ? 
C1 O10 C1 156.8(5) 1_556 7_655 ? 
O12 O10 Ni1 58.8(2) . 1_556 ? 
O11 O10 Ni1 143.0(10) . 1_556 ? 
O11 O10 Ni1 99.4(9) 5_656 1_556 ? 
O13 O10 Ni1 62.9(3) 5_666 1_556 ? 
O13 O10 Ni1 62.9(3) . 1_556 ? 
O12 O10 Ni1 58.8(2) 5_666 1_556 ? 
O10 O10 Ni1 121.2(2) 5_656 1_556 ? 
C2 O10 Ni1 101.67(14) . 1_556 ? 
C2 O10 Ni1 82.78(11) 6_656 1_556 ? 
C2 O10 Ni1 82.78(11) 6_556 1_556 ? 
C2 O10 Ni1 101.67(14) 1_655 1_556 ? 
C1 O10 Ni1 27.89(7) 7_656 1_556 ? 
C1 O10 Ni1 132.5(4) . 1_556 ? 
C1 O10 Ni1 27.89(7) 1_556 1_556 ? 
C1 O10 Ni1 132.5(4) 7_655 1_556 ? 
O12 O10 Ni1 58.8(2) . . ? 
O11 O10 Ni1 99.4(9) . . ? 
O11 O10 Ni1 143.0(10) 5_656 . ? 
O13 O10 Ni1 62.9(3) 5_666 . ? 
O13 O10 Ni1 62.9(3) . . ? 
O12 O10 Ni1 58.8(2) 5_666 . ? 
O10 O10 Ni1 121.2(2) 5_656 . ? 
C2 O10 Ni1 82.78(11) . . ? 
C2 O10 Ni1 101.67(14) 6_656 . ? 
C2 O10 Ni1 101.67(14) 6_556 . ? 
C2 O10 Ni1 82.78(11) 1_655 . ? 
C1 O10 Ni1 132.5(4) 7_656 . ? 
C1 O10 Ni1 27.89(7) . . ? 
C1 O10 Ni1 132.5(4) 1_556 . ? 
C1 O10 Ni1 27.89(7) 7_655 . ? 
Ni1 O10 Ni1 117.6(4) 1_556 . ? 
O12 O10 N1 90.6(2) . 7_656 ? 
O11 O10 N1 107.7(8) . 7_656 ? 
O11 O10 N1 71.2(7) 5_656 7_656 ? 
O13 O10 N1 75.7(3) 5_666 7_656 ? 
O13 O10 N1 105.3(4) . 7_656 ? 
O12 O10 N1 90.6(2) 5_666 7_656 ? 
O10 O10 N1 89.4(2) 5_656 7_656 ? 
C2 O10 N1 133.52(7) . 7_656 ? 
C2 O10 N1 46.37(5) 6_656 7_656 ? 
C2 O10 N1 111.45(6) 6_556 7_656 ? 
C2 O10 N1 68.46(5) 1_655 7_656 ? 
C1 O10 N1 16.45(6) 7_656 7_656 ? 
C1 O10 N1 164.4(3) . 7_656 ? 
C1 O10 N1 55.10(5) 1_556 7_656 ? 
C1 O10 N1 125.17(10) 7_655 7_656 ? 
Ni1 O10 N1 44.34(6) 1_556 7_656 ? 
Ni1 O10 N1 136.5(3) . 7_656 ? 
O12 O10 N1 90.6(2) . . ? 
O11 O10 N1 71.2(7) . . ? 
O11 O10 N1 107.7(8) 5_656 . ? 
O13 O10 N1 105.3(4) 5_666 . ? 
O13 O10 N1 75.7(3) . . ? 
O12 O10 N1 90.6(2) 5_666 . ? 
O10 O10 N1 89.4(2) 5_656 . ? 
C2 O10 N1 46.37(5) . . ? 
C2 O10 N1 133.52(7) 6_656 . ? 
C2 O10 N1 68.46(5) 6_556 . ? 
C2 O10 N1 111.45(6) 1_655 . ? 
C1 O10 N1 164.4(3) 7_656 . ? 
C1 O10 N1 16.45(6) . . ? 
C1 O10 N1 125.17(10) 1_556 . ? 
C1 O10 N1 55.10(5) 7_655 . ? 
Ni1 O10 N1 136.5(3) 1_556 . ? 
Ni1 O10 N1 44.34(6) . . ? 
N1 O10 N1 178.9(5) 7_656 . ? 
O12 O10 N1 90.6(2) . 7_655 ? 
O11 O10 N1 71.2(7) . 7_655 ? 
O11 O10 N1 107.7(8) 5_656 7_655 ? 
O13 O10 N1 75.7(3) 5_666 7_655 ? 
O13 O10 N1 105.3(4) . 7_655 ? 
O12 O10 N1 90.6(2) 5_666 7_655 ? 
O10 O10 N1 89.4(2) 5_656 7_655 ? 
C2 O10 N1 111.45(6) . 7_655 ? 
C2 O10 N1 68.46(5) 6_656 7_655 ? 
C2 O10 N1 133.52(7) 6_556 7_655 ? 
C2 O10 N1 46.37(5) 1_655 7_655 ? 
C1 O10 N1 125.17(10) 7_656 7_655 ? 
C1 O10 N1 55.10(5) . 7_655 ? 
C1 O10 N1 164.4(3) 1_556 7_655 ? 
C1 O10 N1 16.45(6) 7_655 7_655 ? 
Ni1 O10 N1 136.5(3) 1_556 7_655 ? 
Ni1 O10 N1 44.34(6) . 7_655 ? 
N1 O10 N1 114.71(6) 7_656 7_655 ? 
N1 O10 N1 65.28(6) . 7_655 ? 
O11 O11 O10 68.2(9) 5_656 . ? 
O11 O11 O10 68.2(9) 5_656 5_656 ? 
O10 O11 O10 136.4(18) . 5_656 ? 
O11 O11 O12 78.9(5) 5_656 . ? 
O10 O11 O12 10.7(5) . . ? 
O10 O11 O12 147.0(14) 5_656 . ? 
O11 O11 O12 78.9(5) 5_656 5_656 ? 
O10 O11 O12 147.0(14) . 5_656 ? 
O10 O11 O12 10.7(5) 5_656 5_656 ? 
O12 O11 O12 157.7(10) . 5_656 ? 
O11 O11 N2 103.3(4) 5_656 . ? 
O10 O11 N2 94.91(8) . . ? 
O10 O11 N2 94.91(8) 5_656 . ? 
O12 O11 N2 92.55(5) . . ? 
O12 O11 N2 92.55(5) 5_656 . ? 
O11 O11 N2 103.3(4) 5_656 1_655 ? 
O10 O11 N2 94.91(8) . 1_655 ? 
O10 O11 N2 94.91(7) 5_656 1_655 ? 
O12 O11 N2 92.55(5) . 1_655 ? 
O12 O11 N2 92.55(5) 5_656 1_655 ? 
N2 O11 N2 153.4(8) . 1_655 ? 
O11 O11 O13 81.2(4) 5_656 5_666 ? 
O10 O11 O13 21.5(4) . 5_666 ? 
O10 O11 O13 144.8(11) 5_656 5_666 ? 
O12 O11 O13 17.6(4) . 5_666 ? 
O12 O11 O13 153.4(7) 5_656 5_666 ? 
N2 O11 O13 109.2(4) . 5_666 ? 
N2 O11 O13 75.0(4) 1_655 5_666 ? 
O11 O11 O13 81.2(4) 5_656 1_545 ? 
O10 O11 O13 144.8(11) . 1_545 ? 
O10 O11 O13 21.5(4) 5_656 1_545 ? 
O12 O11 O13 153.4(7) . 1_545 ? 
O12 O11 O13 17.6(4) 5_656 1_545 ? 
N2 O11 O13 75.0(4) . 1_545 ? 
N2 O11 O13 109.2(4) 1_655 1_545 ? 
O13 O11 O13 162.4(8) 5_666 1_545 ? 
O11 O11 O13 81.2(4) 5_656 . ? 
O10 O11 O13 21.5(4) . . ? 
O10 O11 O13 144.8(11) 5_656 . ? 
O12 O11 O13 17.6(4) . . ? 
O12 O11 O13 153.4(7) 5_656 . ? 
N2 O11 O13 75.0(4) . . ? 
N2 O11 O13 109.2(4) 1_655 . ? 
O13 O11 O13 35.1(8) 5_666 . ? 
O13 O11 O13 140.5(7) 1_545 . ? 
O11 O11 O13 81.2(4) 5_656 5_656 ? 
O10 O11 O13 144.8(11) . 5_656 ? 
O10 O11 O13 21.5(4) 5_656 5_656 ? 
O12 O11 O13 153.4(7) . 5_656 ? 
O12 O11 O13 17.6(4) 5_656 5_656 ? 
N2 O11 O13 109.2(4) . 5_656 ? 
N2 O11 O13 75.0(4) 1_655 5_656 ? 
O13 O11 O13 140.5(7) 5_666 5_656 ? 
O13 O11 O13 35.1(8) 1_545 5_656 ? 
O13 O11 O13 162.4(8) . 5_656 ? 
O11 O11 C2 92.1(4) 5_656 2 ? 
O10 O11 C2 107.2(2) . 2 ? 
O10 O11 C2 74.43(6) 5_656 2 ? 
O12 O11 C2 107.75(10) . 2 ? 
O12 O11 C2 73.09(6) 5_656 2 ? 
N2 O11 C2 20.80(5) . 2 ? 
N2 O11 C2 156.7(5) 1_655 2 ? 
O13 O11 C2 125.3(4) 5_666 2 ? 
O13 O11 C2 55.4(4) 1_545 2 ? 
O13 O11 C2 90.2(4) . 2 ? 
O13 O11 C2 90.4(4) 5_656 2 ? 
O11 O11 C2 92.1(4) 5_656 1_655 ? 
O10 O11 C2 74.43(6) . 1_655 ? 
O10 O11 C2 107.2(2) 5_656 1_655 ? 
O12 O11 C2 73.09(6) . 1_655 ? 
O12 O11 C2 107.75(10) 5_656 1_655 ? 
N2 O11 C2 156.7(5) . 1_655 ? 
N2 O11 C2 20.80(5) 1_655 1_655 ? 
O13 O11 C2 55.4(4) 5_666 1_655 ? 
O13 O11 C2 125.3(4) 1_545 1_655 ? 
O13 O11 C2 90.4(4) . 1_655 ? 
O13 O11 C2 90.2(4) 5_656 1_655 ? 
C2 O11 C2 175.9(8) 2 1_655 ? 
O11 O11 C2 92.1(4) 5_656 2_655 ? 
O10 O11 C2 107.2(2) . 2_655 ? 
O10 O11 C2 74.43(6) 5_656 2_655 ? 
O12 O11 C2 107.75(10) . 2_655 ? 
O12 O11 C2 73.09(6) 5_656 2_655 ? 
N2 O11 C2 156.7(5) . 2_655 ? 
N2 O11 C2 20.80(5) 1_655 2_655 ? 
O13 O11 C2 90.2(4) 5_666 2_655 ? 
O13 O11 C2 90.4(4) 1_545 2_655 ? 
O13 O11 C2 125.3(4) . 2_655 ? 
O13 O11 C2 55.4(4) 5_656 2_655 ? 
C2 O11 C2 144.39(13) 2 2_655 ? 
C2 O11 C2 35.35(9) 1_655 2_655 ? 
O11 O11 C2 92.1(4) 5_656 . ? 
O10 O11 C2 74.43(6) . . ? 
O10 O11 C2 107.2(2) 5_656 . ? 
O12 O11 C2 73.09(6) . . ? 
O12 O11 C2 107.75(10) 5_656 . ? 
N2 O11 C2 20.80(5) . . ? 
N2 O11 C2 156.7(5) 1_655 . ? 
O13 O11 C2 90.4(4) 5_666 . ? 
O13 O11 C2 90.2(4) 1_545 . ? 
O13 O11 C2 55.4(4) . . ? 
O13 O11 C2 125.3(4) 5_656 . ? 
C2 O11 C2 35.35(9) 2 . ? 
C2 O11 C2 144.39(13) 1_655 . ? 
C2 O11 C2 175.9(8) 2_655 . ? 
O11 O11 C1 138.2(2) 5_656 3 ? 
O10 O11 C1 143.4(9) . 3 ? 
O10 O11 C1 75.6(6) 5_656 3 ? 
O12 O11 C1 134.4(6) . 3 ? 
O12 O11 C1 65.7(3) 5_656 3 ? 
N2 O11 C1 59.1(2) . 3 ? 
N2 O11 C1 99.8(4) 1_655 3 ? 
O13 O11 C1 138.9(6) 5_666 3 ? 
O13 O11 C1 58.32(17) 1_545 3 ? 
O13 O11 C1 122.8(5) . 3 ? 
O13 O11 C1 71.7(3) 5_656 3 ? 
C2 O11 C1 57.75(18) 2 3 ? 
C2 O11 C1 118.7(5) 1_655 3 ? 
C2 O11 C1 97.8(3) 2_655 3 ? 
C2 O11 C1 79.1(3) . 3 ? 
O11 O11 C1 138.2(3) 5_656 5_655 ? 
O10 O11 C1 143.4(9) . 5_655 ? 
O10 O11 C1 75.6(6) 5_656 5_655 ? 
O12 O11 C1 134.4(6) . 5_655 ? 
O12 O11 C1 65.7(3) 5_656 5_655 ? 
N2 O11 C1 99.8(4) . 5_655 ? 
N2 O11 C1 59.1(2) 1_655 5_655 ? 
O13 O11 C1 122.8(5) 5_666 5_655 ? 
O13 O11 C1 71.7(3) 1_545 5_655 ? 
O13 O11 C1 138.9(6) . 5_655 ? 
O13 O11 C1 58.32(17) 5_656 5_655 ? 
C2 O11 C1 97.8(3) 2 5_655 ? 
C2 O11 C1 79.1(3) 1_655 5_655 ? 
C2 O11 C1 57.75(18) 2_655 5_655 ? 
C2 O11 C1 118.7(5) . 5_655 ? 
C1 O11 C1 41.2(2) 3 5_655 ? 
O11 O11 C1 138.2(3) 5_656 . ? 
O10 O11 C1 75.6(6) . . ? 
O10 O11 C1 143.4(9) 5_656 . ? 
O12 O11 C1 65.7(3) . . ? 
O12 O11 C1 134.4(6) 5_656 . ? 
N2 O11 C1 59.1(2) . . ? 
N2 O11 C1 99.8(4) 1_655 . ? 
O13 O11 C1 71.7(3) 5_666 . ? 
O13 O11 C1 122.8(5) 1_545 . ? 
O13 O11 C1 58.32(17) . . ? 
O13 O11 C1 138.9(6) 5_656 . ? 
C2 O11 C1 79.1(3) 2 . ? 
C2 O11 C1 97.8(3) 1_655 . ? 
C2 O11 C1 118.7(5) 2_655 . ? 
C2 O11 C1 57.75(18) . . ? 
C1 O11 C1 69.0(4) 3 . ? 
C1 O11 C1 83.6(5) 5_655 . ? 
O11 O11 C1 138.2(3) 5_656 7_655 ? 
O10 O11 C1 75.6(6) . 7_655 ? 
O10 O11 C1 143.4(9) 5_656 7_655 ? 
O12 O11 C1 65.7(3) . 7_655 ? 
O12 O11 C1 134.4(6) 5_656 7_655 ? 
N2 O11 C1 99.8(4) . 7_655 ? 
N2 O11 C1 59.1(2) 1_655 7_655 ? 
O13 O11 C1 58.32(17) 5_666 7_655 ? 
O13 O11 C1 138.9(6) 1_545 7_655 ? 
O13 O11 C1 71.7(3) . 7_655 ? 
O13 O11 C1 122.8(5) 5_656 7_655 ? 
C2 O11 C1 118.7(5) 2 7_655 ? 
C2 O11 C1 57.75(18) 1_655 7_655 ? 
C2 O11 C1 79.1(3) 2_655 7_655 ? 
C2 O11 C1 97.8(3) . 7_655 ? 
C1 O11 C1 83.6(5) 3 7_655 ? 
C1 O11 C1 69.0(4) 5_655 7_655 ? 
C1 O11 C1 41.2(2) . 7_655 ? 
O11 O11 N1 137.8(2) 5_656 3 ? 
O10 O11 N1 127.4(7) . 3 ? 
O10 O11 N1 86.8(6) 5_656 3 ? 
O12 O11 N1 119.6(4) . 3 ? 
O12 O11 N1 78.0(3) 5_656 3 ? 
N2 O11 N1 43.60(17) . 3 ? 
N2 O11 N1 112.5(6) 1_655 3 ? 
O13 O11 N1 128.4(5) 5_666 3 ? 
O13 O11 N1 66.8(3) 1_545 3 ? 
O13 O11 N1 106.1(4) . 3 ? 
O13 O11 N1 87.1(3) 5_656 3 ? 
C2 O11 N1 47.41(14) 2 3 ? 
C2 O11 N1 128.6(6) 1_655 3 ? 
C2 O11 N1 114.0(5) 2_655 3 ? 
C2 O11 N1 62.62(19) . 3 ? 
C1 O11 N1 17.36(11) 3 3 ? 
C1 O11 N1 56.3(3) 5_655 3 ? 
C1 O11 N1 56.7(3) . 3 ? 
C1 O11 N1 81.4(5) 7_655 3 ? 
O12 O12 O13 61.5(15) 5_666 5_666 ? 
O12 O12 O13 61.5(15) 5_666 . ? 
O13 O12 O13 123(3) 5_666 . ? 
O12 O12 O10 180.000(7) 5_666 . ? 
O13 O12 O10 118.5(15) 5_666 . ? 
O13 O12 O10 118.5(15) . . ? 
O12 O12 O10 0.000(6) 5_666 5_666 ? 
O13 O12 O10 61.5(15) 5_666 5_666 ? 
O13 O12 O10 61.5(15) . 5_666 ? 
O10 O12 O10 180.000(2) . 5_666 ? 
O12 O12 O11 168.9(5) 5_666 . ? 
O13 O12 O11 117.9(15) 5_666 . ? 
O13 O12 O11 117.9(15) . . ? 
O10 O12 O11 11.1(5) . . ? 
O10 O12 O11 168.9(5) 5_666 . ? 
O12 O12 O11 168.9(5) 5_666 5_656 ? 
O13 O12 O11 117.9(15) 5_666 5_656 ? 
O13 O12 O11 117.9(15) . 5_656 ? 
O10 O12 O11 11.1(5) . 5_656 ? 
O10 O12 O11 168.9(5) 5_666 5_656 ? 
O11 O12 O11 22.3(10) . 5_656 ? 
O12 O12 Ni1 79.9(6) 5_666 1_556 ? 
O13 O12 Ni1 85.2(5) 5_666 1_556 ? 
O13 O12 Ni1 85.2(5) . 1_556 ? 
O10 O12 Ni1 100.1(6) . 1_556 ? 
O10 O12 Ni1 79.9(6) 5_666 1_556 ? 
O11 O12 Ni1 111.2(8) . 1_556 ? 
O11 O12 Ni1 88.9(6) 5_656 1_556 ? 
O12 O12 Ni1 79.9(6) 5_666 . ? 
O13 O12 Ni1 85.2(5) 5_666 . ? 
O13 O12 Ni1 85.2(5) . . ? 
O10 O12 Ni1 100.1(6) . . ? 
O10 O12 Ni1 79.9(6) 5_666 . ? 
O11 O12 Ni1 88.9(6) . . ? 
O11 O12 Ni1 111.2(8) 5_656 . ? 
Ni1 O12 Ni1 159.9(11) 1_556 . ? 
O12 O12 C1 100.9(5) 5_666 . ? 
O13 O12 C1 114.0(2) 5_666 . ? 
O13 O12 C1 77.0(3) . . ? 
O10 O12 C1 79.1(5) . . ? 
O10 O12 C1 100.9(5) 5_666 . ? 
O11 O12 C1 68.7(6) . . ? 
O11 O12 C1 89.4(8) 5_656 . ? 
Ni1 O12 C1 158.86(6) 1_556 . ? 
Ni1 O12 C1 29.95(5) . . ? 
O12 O12 C1 100.9(5) 5_666 7_656 ? 
O13 O12 C1 77.0(3) 5_666 7_656 ? 
O13 O12 C1 114.0(2) . 7_656 ? 
O10 O12 C1 79.1(5) . 7_656 ? 
O10 O12 C1 100.9(5) 5_666 7_656 ? 
O11 O12 C1 89.4(8) . 7_656 ? 
O11 O12 C1 68.7(6) 5_656 7_656 ? 
Ni1 O12 C1 29.95(5) 1_556 7_656 ? 
Ni1 O12 C1 158.86(6) . 7_656 ? 
C1 O12 C1 158.1(10) . 7_656 ? 
O12 O12 C1 100.9(5) 5_666 7_655 ? 
O13 O12 C1 77.0(3) 5_666 7_655 ? 
O13 O12 C1 114.0(2) . 7_655 ? 
O10 O12 C1 79.1(5) . 7_655 ? 
O10 O12 C1 100.9(5) 5_666 7_655 ? 
O11 O12 C1 68.7(6) . 7_655 ? 
O11 O12 C1 89.4(8) 5_656 7_655 ? 
Ni1 O12 C1 158.86(6) 1_556 7_655 ? 
Ni1 O12 C1 29.95(5) . 7_655 ? 
C1 O12 C1 42.14(11) . 7_655 ? 
C1 O12 C1 132.0(5) 7_656 7_655 ? 
O12 O12 C1 100.9(5) 5_666 1_556 ? 
O13 O12 C1 114.0(2) 5_666 1_556 ? 
O13 O12 C1 77.0(3) . 1_556 ? 
O10 O12 C1 79.1(5) . 1_556 ? 
O10 O12 C1 100.9(5) 5_666 1_556 ? 
O11 O12 C1 89.4(8) . 1_556 ? 
O11 O12 C1 68.7(6) 5_656 1_556 ? 
Ni1 O12 C1 29.95(5) 1_556 1_556 ? 
Ni1 O12 C1 158.86(6) . 1_556 ? 
C1 O12 C1 132.0(5) . 1_556 ? 
C1 O12 C1 42.14(11) 7_656 1_556 ? 
C1 O12 C1 158.1(10) 7_655 1_556 ? 
O12 O12 C2 115.4(4) 5_666 . ? 
O13 O12 C2 169.6(5) 5_666 . ? 
O13 O12 C2 54.9(11) . . ? 
O10 O12 C2 64.6(4) . . ? 
O10 O12 C2 115.4(4) 5_666 . ? 
O11 O12 C2 63.0(4) . . ? 
O11 O12 C2 67.2(5) 5_656 . ? 
Ni1 O12 C2 104.23(19) 1_556 . ? 
Ni1 O12 C2 84.48(16) . . ? 
C1 O12 C2 56.03(19) . . ? 
C1 O12 C2 113.3(5) 7_656 . ? 
C1 O12 C2 94.5(3) 7_655 . ? 
C1 O12 C2 76.0(3) 1_556 . ? 
O12 O12 C2 115.4(4) 5_666 6_556 ? 
O13 O12 C2 169.6(5) 5_666 6_556 ? 
O13 O12 C2 54.9(11) . 6_556 ? 
O10 O12 C2 64.6(4) . 6_556 ? 
O10 O12 C2 115.4(4) 5_666 6_556 ? 
O11 O12 C2 67.2(5) . 6_556 ? 
O11 O12 C2 63.0(4) 5_656 6_556 ? 
Ni1 O12 C2 84.48(16) 1_556 6_556 ? 
Ni1 O12 C2 104.23(19) . 6_556 ? 
C1 O12 C2 76.0(3) . 6_556 ? 
C1 O12 C2 94.5(3) 7_656 6_556 ? 
C1 O12 C2 113.3(5) 7_655 6_556 ? 
C1 O12 C2 56.03(19) 1_556 6_556 ? 
C2 O12 C2 20.00(10) . 6_556 ? 
O12 O12 C2 115.4(4) 5_666 6_656 ? 
O13 O12 C2 54.9(11) 5_666 6_656 ? 
O13 O12 C2 169.6(5) . 6_656 ? 
O10 O12 C2 64.6(4) . 6_656 ? 
O10 O12 C2 115.4(4) 5_666 6_656 ? 
O11 O12 C2 67.2(5) . 6_656 ? 
O11 O12 C2 63.0(4) 5_656 6_656 ? 
Ni1 O12 C2 84.48(16) 1_556 6_656 ? 
Ni1 O12 C2 104.23(19) . 6_656 ? 
C1 O12 C2 113.3(5) . 6_656 ? 
C1 O12 C2 56.03(19) 7_656 6_656 ? 
C1 O12 C2 76.0(3) 7_655 6_656 ? 
C1 O12 C2 94.5(3) 1_556 6_656 ? 
C2 O12 C2 129.2(9) . 6_656 ? 
C2 O12 C2 124.9(8) 6_556 6_656 ? 
O12 O12 C2 115.4(4) 5_666 1_655 ? 
O13 O12 C2 54.9(11) 5_666 1_655 ? 
O13 O12 C2 169.6(5) . 1_655 ? 
O10 O12 C2 64.6(4) . 1_655 ? 
O10 O12 C2 115.4(4) 5_666 1_655 ? 
O11 O12 C2 63.0(4) . 1_655 ? 
O11 O12 C2 67.2(5) 5_656 1_655 ? 
Ni1 O12 C2 104.23(19) 1_556 1_655 ? 
Ni1 O12 C2 84.48(16) . 1_655 ? 
C1 O12 C2 94.5(3) . 1_655 ? 
C1 O12 C2 76.0(3) 7_656 1_655 ? 
C1 O12 C2 56.03(19) 7_655 1_655 ? 
C1 O12 C2 113.3(5) 1_556 1_655 ? 
C2 O12 C2 124.9(8) . 1_655 ? 
C2 O12 C2 129.2(9) 6_556 1_655 ? 
C2 O12 C2 20.00(10) 6_656 1_655 ? 
O12 O12 O11 7.9(4) 5_666 5_666 ? 
O13 O12 O11 61.8(15) 5_666 5_666 ? 
O13 O12 O11 61.8(15) . 5_666 ? 
O10 O12 O11 172.1(4) . 5_666 ? 
O10 O12 O11 7.9(4) 5_666 5_666 ? 
O11 O12 O11 176.8(2) . 5_666 ? 
O11 O12 O11 161.0(8) 5_656 5_666 ? 
Ni1 O12 O11 72.1(6) 1_556 5_666 ? 
Ni1 O12 O11 87.8(7) . 5_666 ? 
C1 O12 O11 108.3(7) . 5_666 ? 
C1 O12 O11 93.6(6) 7_656 5_666 ? 
C1 O12 O11 108.3(7) 7_655 5_666 ? 
C1 O12 O11 93.6(6) 1_556 5_666 ? 
C2 O12 O11 116.7(4) . 5_666 ? 
C2 O12 O11 113.6(4) 6_556 5_666 ? 
C2 O12 O11 113.6(4) 6_656 5_666 ? 
C2 O12 O11 116.7(4) 1_655 5_666 ? 
O12 O12 O11 7.9(4) 5_666 1_565 ? 
O13 O12 O11 61.8(15) 5_666 1_565 ? 
O13 O12 O11 61.8(15) . 1_565 ? 
O10 O12 O11 172.1(4) . 1_565 ? 
O10 O12 O11 7.9(4) 5_666 1_565 ? 
O11 O12 O11 161.0(8) . 1_565 ? 
O11 O12 O11 176.8(2) 5_656 1_565 ? 
Ni1 O12 O11 87.8(7) 1_556 1_565 ? 
Ni1 O12 O11 72.1(6) . 1_565 ? 
C1 O12 O11 93.6(6) . 1_565 ? 
C1 O12 O11 108.3(7) 7_656 1_565 ? 
C1 O12 O11 93.6(6) 7_655 1_565 ? 
C1 O12 O11 108.3(7) 1_556 1_565 ? 
C2 O12 O11 113.6(4) . 1_565 ? 
C2 O12 O11 116.7(4) 6_556 1_565 ? 
C2 O12 O11 116.7(4) 6_656 1_565 ? 
C2 O12 O11 113.6(4) 1_655 1_565 ? 
O11 O12 O11 15.8(7) 5_666 1_565 ? 
O12 O12 C1 62.4(4) 5_666 5_666 ? 
O13 O12 C1 59.6(6) 5_666 5_666 ? 
O13 O12 C1 93.7(11) . 5_666 ? 
O10 O12 C1 117.6(4) . 5_666 ? 
O10 O12 C1 62.4(4) 5_666 5_666 ? 
O11 O12 C1 127.9(7) . 5_666 ? 
O11 O12 C1 107.2(5) 5_656 5_666 ? 
Ni1 O12 C1 26.78(14) 1_556 5_666 ? 
Ni1 O12 C1 137.0(8) . 5_666 ? 
C1 O12 C1 163.3(9) . 5_666 ? 
C1 O12 C1 38.56(12) 7_656 5_666 ? 
C1 O12 C1 136.4(4) 7_655 5_666 ? 
C1 O12 C1 56.73(13) 1_556 5_666 ? 
C2 O12 C1 129.02(7) . 5_666 ? 
C2 O12 C1 110.08(6) 6_556 5_666 ? 
C2 O12 C1 76.58(6) 6_656 5_666 ? 
C2 O12 C1 93.11(6) 1_655 5_666 ? 
O11 O12 C1 55.1(5) 5_666 5_666 ? 
O11 O12 C1 69.8(6) 1_565 5_666 ? 
O12 O13 O12 57(3) 5_666 . ? 
O12 O13 O13 28.5(15) 5_666 5_666 ? 
O12 O13 O13 28.5(15) . 5_666 ? 
O12 O13 O10 33.2(14) 5_666 5_666 ? 
O12 O13 O10 90.2(19) . 5_666 ? 
O13 O13 O10 61.7(6) 5_666 5_666 ? 
O12 O13 O10 90.2(19) 5_666 . ? 
O12 O13 O10 33.2(14) . . ? 
O13 O13 O10 61.7(6) 5_666 . ? 
O10 O13 O10 123.3(12) 5_666 . ? 
O12 O13 C2 161.1(13) 5_666 . ? 
O12 O13 C2 107.7(14) . . ? 
O13 O13 C2 135.3(3) 5_666 . ? 
O10 O13 C2 158.5(7) 5_666 . ? 
O10 O13 C2 75.2(3) . . ? 
O12 O13 C2 161.1(13) 5_666 6_556 ? 
O12 O13 C2 107.7(14) . 6_556 ? 
O13 O13 C2 135.3(3) 5_666 6_556 ? 
O10 O13 C2 158.5(7) 5_666 6_556 ? 
O10 O13 C2 75.2(3) . 6_556 ? 
C2 O13 C2 23.33(15) . 6_556 ? 
O12 O13 C2 107.7(14) 5_666 5_566 ? 
O12 O13 C2 161.1(13) . 5_566 ? 
O13 O13 C2 135.3(3) 5_666 5_566 ? 
O10 O13 C2 75.2(3) 5_666 5_566 ? 
O10 O13 C2 158.5(7) . 5_566 ? 
C2 O13 C2 89.4(6) . 5_566 ? 
C2 O13 C2 84.7(6) 6_556 5_566 ? 
O12 O13 C2 107.7(14) 5_666 2_565 ? 
O12 O13 C2 161.1(13) . 2_565 ? 
O13 O13 C2 135.3(3) 5_666 2_565 ? 
O10 O13 C2 75.2(3) 5_666 2_565 ? 
O10 O13 C2 158.5(7) . 2_565 ? 
C2 O13 C2 84.7(6) . 2_565 ? 
C2 O13 C2 89.4(6) 6_556 2_565 ? 
C2 O13 C2 23.33(15) 5_566 2_565 ? 
O12 O13 Ni1 74.2(5) 5_666 1_556 ? 
O12 O13 Ni1 74.2(5) . 1_556 ? 
O13 O13 Ni1 71.9(4) 5_666 1_556 ? 
O10 O13 Ni1 81.5(3) 5_666 1_556 ? 
O10 O13 Ni1 81.5(3) . 1_556 ? 
C2 O13 Ni1 114.4(3) . 1_556 ? 
C2 O13 Ni1 91.63(17) 6_556 1_556 ? 
C2 O13 Ni1 91.63(17) 5_566 1_556 ? 
C2 O13 Ni1 114.4(3) 2_565 1_556 ? 
O12 O13 Ni1 74.2(5) 5_666 . ? 
O12 O13 Ni1 74.2(5) . . ? 
O13 O13 Ni1 71.9(4) 5_666 . ? 
O10 O13 Ni1 81.5(3) 5_666 . ? 
O10 O13 Ni1 81.5(3) . . ? 
C2 O13 Ni1 91.63(17) . . ? 
C2 O13 Ni1 114.4(3) 6_556 . ? 
C2 O13 Ni1 114.4(3) 5_566 . ? 
C2 O13 Ni1 91.63(17) 2_565 . ? 
Ni1 O13 Ni1 143.8(8) 1_556 . ? 
O12 O13 C1 103.1(7) 5_666 . ? 
O12 O13 C1 83.3(5) . . ? 
O13 O13 C1 93.6(4) 5_666 . ? 
O10 O13 C1 110.2(3) 5_666 . ? 
O10 O13 C1 73.38(10) . . ? 
C2 O13 C1 61.69(19) . . ? 
C2 O13 C1 84.4(3) 6_556 . ? 
C2 O13 C1 112.7(5) 5_566 . ? 
C2 O13 C1 90.5(3) 2_565 . ? 
Ni1 O13 C1 154.8(5) 1_556 . ? 
Ni1 O13 C1 30.00(5) . . ? 
O12 O13 C1 83.3(5) 5_666 3_566 ? 
O12 O13 C1 103.1(7) . 3_566 ? 
O13 O13 C1 93.6(4) 5_666 3_566 ? 
O10 O13 C1 73.38(10) 5_666 3_566 ? 
O10 O13 C1 110.2(3) . 3_566 ? 
C2 O13 C1 112.7(5) . 3_566 ? 
C2 O13 C1 90.5(3) 6_556 3_566 ? 
C2 O13 C1 61.69(19) 5_566 3_566 ? 
C2 O13 C1 84.4(3) 2_565 3_566 ? 
Ni1 O13 C1 30.00(5) 1_556 3_566 ? 
Ni1 O13 C1 154.8(5) . 3_566 ? 
C1 O13 C1 172.8(8) . 3_566 ? 
O12 O13 C1 83.3(5) 5_666 3_565 ? 
O12 O13 C1 103.1(7) . 3_565 ? 
O13 O13 C1 93.6(4) 5_666 3_565 ? 
O10 O13 C1 73.38(10) 5_666 3_565 ? 
O10 O13 C1 110.2(3) . 3_565 ? 
C2 O13 C1 90.5(3) . 3_565 ? 
C2 O13 C1 112.7(5) 6_556 3_565 ? 
C2 O13 C1 84.4(3) 5_566 3_565 ? 
C2 O13 C1 61.69(19) 2_565 3_565 ? 
Ni1 O13 C1 154.8(5) 1_556 3_565 ? 
Ni1 O13 C1 30.00(5) . 3_565 ? 
C1 O13 C1 42.03(9) . 3_565 ? 
C1 O13 C1 137.31(16) 3_566 3_565 ? 
O12 O13 C1 103.1(7) 5_666 1_556 ? 
O12 O13 C1 83.3(5) . 1_556 ? 
O13 O13 C1 93.6(4) 5_666 1_556 ? 
O10 O13 C1 110.2(3) 5_666 1_556 ? 
O10 O13 C1 73.38(10) . 1_556 ? 
C2 O13 C1 84.4(3) . 1_556 ? 
C2 O13 C1 61.69(19) 6_556 1_556 ? 
C2 O13 C1 90.5(3) 5_566 1_556 ? 
C2 O13 C1 112.7(5) 2_565 1_556 ? 
Ni1 O13 C1 30.00(5) 1_556 1_556 ? 
Ni1 O13 C1 154.8(5) . 1_556 ? 
C1 O13 C1 137.31(16) . 1_556 ? 
C1 O13 C1 42.03(9) 3_566 1_556 ? 
C1 O13 C1 172.8(8) 3_565 1_556 ? 
O12 O13 O11 44.4(14) 5_666 5_666 ? 
O12 O13 O11 100.6(17) . 5_666 ? 
O13 O13 O11 72.5(4) 5_666 5_666 ? 
O10 O13 O11 13.7(3) 5_666 5_666 ? 
O10 O13 O11 133.3(9) . 5_666 ? 
C2 O13 O11 151.5(7) . 5_666 ? 
C2 O13 O11 144.8(6) 6_556 5_666 ? 
C2 O13 O11 63.22(11) 5_566 5_666 ? 
C2 O13 O11 67.13(15) 2_565 5_666 ? 
Ni1 O13 O11 76.2(4) 1_556 5_666 ? 
Ni1 O13 O11 93.0(5) . 5_666 ? 
C1 O13 O11 119.9(4) . 5_666 ? 
C1 O13 O11 62.5(4) 3_566 5_666 ? 
C1 O13 O11 79.9(4) 3_565 5_666 ? 
C1 O13 O11 102.3(4) 1_556 5_666 ? 
O12 O13 O11 44.4(14) 5_666 1_565 ? 
O12 O13 O11 100.6(17) . 1_565 ? 
O13 O13 O11 72.5(4) 5_666 1_565 ? 
O10 O13 O11 13.7(3) 5_666 1_565 ? 
O10 O13 O11 133.3(9) . 1_565 ? 
C2 O13 O11 144.8(6) . 1_565 ? 
C2 O13 O11 151.5(7) 6_556 1_565 ? 
C2 O13 O11 67.13(15) 5_566 1_565 ? 
C2 O13 O11 63.22(11) 2_565 1_565 ? 
Ni1 O13 O11 93.0(5) 1_556 1_565 ? 
Ni1 O13 O11 76.2(4) . 1_565 ? 
C1 O13 O11 102.3(4) . 1_565 ? 
C1 O13 O11 79.9(4) 3_566 1_565 ? 
C1 O13 O11 62.5(4) 3_565 1_565 ? 
C1 O13 O11 119.9(4) 1_556 1_565 ? 
O11 O13 O11 17.6(8) 5_666 1_565 ? 
O12 O13 O11 100.6(17) 5_666 . ? 
O12 O13 O11 44.4(14) . . ? 
O13 O13 O11 72.5(4) 5_666 . ? 
O10 O13 O11 133.3(9) 5_666 . ? 
O10 O13 O11 13.7(3) . . ? 
C2 O13 O11 63.22(11) . . ? 
C2 O13 O11 67.13(15) 6_556 . ? 
C2 O13 O11 151.5(7) 5_566 . ? 
C2 O13 O11 144.8(6) 2_565 . ? 
Ni1 O13 O11 93.0(5) 1_556 . ? 
Ni1 O13 O11 76.2(4) . . ? 
C1 O13 O11 62.5(4) . . ? 
C1 O13 O11 119.9(4) 3_566 . ? 
C1 O13 O11 102.3(4) 3_565 . ? 
C1 O13 O11 79.9(4) 1_556 . ? 
O11 O13 O11 144.9(8) 5_666 . ? 
O11 O13 O11 140.5(7) 1_565 . ? 
O12 O13 O11 100.6(17) 5_666 5_656 ? 
O12 O13 O11 44.4(14) . 5_656 ? 
O13 O13 O11 72.5(4) 5_666 5_656 ? 
O10 O13 O11 133.3(9) 5_666 5_656 ? 
O10 O13 O11 13.7(3) . 5_656 ? 
C2 O13 O11 67.13(15) . 5_656 ? 
C2 O13 O11 63.22(11) 6_556 5_656 ? 
C2 O13 O11 144.8(6) 5_566 5_656 ? 
C2 O13 O11 151.5(7) 2_565 5_656 ? 
Ni1 O13 O11 76.2(4) 1_556 5_656 ? 
Ni1 O13 O11 93.0(5) . 5_656 ? 
C1 O13 O11 79.9(4) . 5_656 ? 
C1 O13 O11 102.3(4) 3_566 5_656 ? 
C1 O13 O11 119.9(4) 3_565 5_656 ? 
C1 O13 O11 62.5(4) 1_556 5_656 ? 
O11 O13 O11 140.5(7) 5_666 5_656 ? 
O11 O13 O11 144.9(8) 1_565 5_656 ? 
O11 O13 O11 17.6(8) . 5_656 ? 
O12 O13 N1 118.0(7) 5_666 . ? 
O12 O13 N1 89.1(8) . . ? 
O13 O13 N1 105.0(3) 5_666 . ? 
O10 O13 N1 124.69(15) 5_666 . ? 
O10 O13 N1 71.10(12) . . ? 
C2 O13 N1 46.25(14) . . ? 
C2 O13 N1 69.0(2) 6_556 . ? 
C2 O13 N1 108.9(5) 5_566 . ? 
C2 O13 N1 89.5(4) 2_565 . ? 
Ni1 O13 N1 149.51(8) 1_556 . ? 
Ni1 O13 N1 45.46(4) . . ? 
C1 O13 N1 15.46(8) . . ? 
C1 O13 N1 158.7(6) 3_566 . ? 
C1 O13 N1 53.13(8) 3_565 . ? 
C1 O13 N1 124.6(2) 1_556 . ? 
O11 O13 N1 132.9(4) 5_666 . ? 
O11 O13 N1 115.4(4) 1_565 . ? 
O11 O13 N1 58.3(3) . . ? 
O11 O13 N1 74.1(4) 5_656 . ? 
C1 N1 Fe1 178.7(3) . . ? 
C1 N1 O11 80.21(14) . . ? 
Fe1 N1 O11 98.90(8) . . ? 
C1 N1 O11 80.21(14) . 5_655 ? 
Fe1 N1 O11 98.90(8) . 5_655 ? 
O11 N1 O11 95.6(5) . 5_655 ? 
C1 N1 O10 66.43(19) . . ? 
Fe1 N1 O10 113.03(18) . . ? 
O11 N1 O10 22.0(3) . . ? 
O11 N1 O10 108.7(3) 5_655 . ? 
C1 N1 O10 66.43(19) . 1_554 ? 
Fe1 N1 O10 113.03(18) . 1_554 ? 
O11 N1 O10 108.7(3) . 1_554 ? 
O11 N1 O10 22.0(3) 5_655 1_554 ? 
O10 N1 O10 114.71(6) . 1_554 ? 
C1 N1 O13 57.6(3) . . ? 
Fe1 N1 O13 122.7(2) . . ? 
O11 N1 O13 54.9(3) . . ? 
O11 N1 O13 130.1(4) 5_655 . ? 
O10 N1 O13 33.2(3) . . ? 
O10 N1 O13 123.2(3) 1_554 . ? 
C1 N1 O13 57.6(3) . 1_554 ? 
Fe1 N1 O13 122.7(2) . 1_554 ? 
O11 N1 O13 130.1(4) . 1_554 ? 
O11 N1 O13 54.9(3) 5_655 1_554 ? 
O10 N1 O13 123.2(3) . 1_554 ? 
O10 N1 O13 33.2(3) 1_554 1_554 ? 
O13 N1 O13 110.6(3) . 1_554 ? 
C2 N2 C2 116.1(3) . 2 ? 
C2 N2 Fe1 121.94(17) . . ? 
C2 N2 Fe1 121.94(17) 2 . ? 
C2 N2 O11 83.0(2) . . ? 
C2 N2 O11 83.0(2) 2 . ? 
Fe1 N2 O11 103.3(4) . . ? 
C2 N2 O11 83.0(2) . 1_455 ? 
C2 N2 O11 83.0(2) 2 1_455 ? 
Fe1 N2 O11 103.3(4) . 1_455 ? 
O11 N2 O11 153.4(8) . 1_455 ? 
C2 N2 O11 75.18(17) . 5_656 ? 
C2 N2 O11 75.18(17) 2 5_656 ? 
Fe1 N2 O11 118.9(3) . 5_656 ? 
O11 N2 O11 15.6(7) . 5_656 ? 
O11 N2 O11 137.76(12) 1_455 5_656 ? 
C2 N2 O11 75.18(17) . 5_556 ? 
C2 N2 O11 75.18(17) 2 5_556 ? 
Fe1 N2 O11 118.9(3) . 5_556 ? 
O11 N2 O11 137.76(12) . 5_556 ? 
O11 N2 O11 15.6(7) 1_455 5_556 ? 
O11 N2 O11 122.1(6) 5_656 5_556 ? 
C2 N2 O10 61.66(18) . . ? 
C2 N2 O10 96.3(2) 2 . ? 
Fe1 N2 O10 110.16(5) . . ? 
O11 N2 O10 21.7(2) . . ? 
O11 N2 O10 140.4(3) 1_455 . ? 
O11 N2 O10 21.4(2) 5_656 . ? 
O11 N2 O10 126.7(3) 5_556 . ? 
C2 N2 O10 96.3(2) . 5_556 ? 
C2 N2 O10 61.66(18) 2 5_556 ? 
Fe1 N2 O10 110.16(5) . 5_556 ? 
O11 N2 O10 140.4(3) . 5_556 ? 
O11 N2 O10 21.7(2) 1_455 5_556 ? 
O11 N2 O10 126.7(3) 5_656 5_556 ? 
O11 N2 O10 21.4(2) 5_556 5_556 ? 
O10 N2 O10 139.68(11) . 5_556 ? 
C2 N2 O10 96.3(2) . 5_656 ? 
C2 N2 O10 61.66(18) 2 5_656 ? 
Fe1 N2 O10 110.16(5) . 5_656 ? 
O11 N2 O10 21.7(2) . 5_656 ? 
O11 N2 O10 140.4(3) 1_455 5_656 ? 
O11 N2 O10 21.4(2) 5_656 5_656 ? 
O11 N2 O10 126.7(3) 5_556 5_656 ? 
O10 N2 O10 40.3(4) . 5_656 ? 
O10 N2 O10 121.7(3) 5_556 5_656 ? 
C2 N2 O10 61.66(18) . 1_455 ? 
C2 N2 O10 96.3(2) 2 1_455 ? 
Fe1 N2 O10 110.16(5) . 1_455 ? 
O11 N2 O10 140.4(3) . 1_455 ? 
O11 N2 O10 21.7(2) 1_455 1_455 ? 
O11 N2 O10 126.7(3) 5_656 1_455 ? 
O11 N2 O10 21.4(2) 5_556 1_455 ? 
O10 N2 O10 121.7(3) . 1_455 ? 
O10 N2 O10 40.3(4) 5_556 1_455 ? 
O10 N2 O10 139.68(11) 5_656 1_455 ? 
N1 C1 Ni1 178.8(3) . . ? 
N1 C1 O13 106.9(3) . . ? 
Ni1 C1 O13 72.8(3) . . ? 
N1 C1 O13 106.9(3) . 1_554 ? 
Ni1 C1 O13 72.8(3) . 1_554 ? 
O13 C1 O13 137.31(16) . 1_554 ? 
N1 C1 O12 113.1(4) . . ? 
Ni1 C1 O12 67.1(4) . . ? 
O13 C1 O12 19.7(4) . . ? 
O13 C1 O12 139.5(5) 1_554 . ? 
N1 C1 O12 113.1(4) . 1_554 ? 
Ni1 C1 O12 67.1(4) . 1_554 ? 
O13 C1 O12 139.5(5) . 1_554 ? 
O13 C1 O12 19.7(4) 1_554 1_554 ? 
O12 C1 O12 132.0(5) . 1_554 ? 
N1 C1 O10 97.1(2) . . ? 
Ni1 C1 O10 83.34(19) . . ? 
O13 C1 O10 36.9(3) . . ? 
O13 C1 O10 154.0(4) 1_554 . ? 
O12 C1 O10 22.5(6) . . ? 
O12 C1 O10 137.90(9) 1_554 . ? 
N1 C1 O10 97.1(2) . 1_554 ? 
Ni1 C1 O10 83.34(19) . 1_554 ? 
O13 C1 O10 154.0(4) . 1_554 ? 
O13 C1 O10 36.9(3) 1_554 1_554 ? 
O12 C1 O10 137.90(9) . 1_554 ? 
O12 C1 O10 22.5(6) 1_554 1_554 ? 
O10 C1 O10 131.4(2) . 1_554 ? 
N1 C1 O11 82.43(14) . 5_655 ? 
Ni1 C1 O11 98.34(8) . 5_655 ? 
O13 C1 O11 151.1(4) . 5_655 ? 
O13 C1 O11 59.1(3) 1_554 5_655 ? 
O12 C1 O11 131.5(4) . 5_655 ? 
O12 C1 O11 45.6(6) 1_554 5_655 ? 
O10 C1 O11 116.1(3) . 5_655 ? 
O10 C1 O11 23.2(3) 1_554 5_655 ? 
N1 C1 O11 82.43(14) . . ? 
Ni1 C1 O11 98.34(8) . . ? 
O13 C1 O11 59.1(3) . . ? 
O13 C1 O11 151.1(4) 1_554 . ? 
O12 C1 O11 45.6(6) . . ? 
O12 C1 O11 131.5(4) 1_554 . ? 
O10 C1 O11 23.2(3) . . ? 
O10 C1 O11 116.1(3) 1_554 . ? 
O11 C1 O11 96.4(5) 5_655 . ? 
N1 C1 O12 123.6(2) . 5_666 ? 
Ni1 C1 O12 56.2(3) . 5_666 ? 
O13 C1 O12 17.4(4) . 5_666 ? 
O13 C1 O12 125.6(4) 1_554 5_666 ? 
O12 C1 O12 16.7(9) . 5_666 ? 
O12 C1 O12 123.27(13) 1_554 5_666 ? 
O10 C1 O12 39.2(5) . 5_666 ? 
O10 C1 O12 136.75(16) 1_554 5_666 ? 
O11 C1 O12 139.7(2) 5_655 5_666 ? 
O11 C1 O12 62.2(5) . 5_666 ? 
N1 C1 O12 123.6(2) . 5_665 ? 
Ni1 C1 O12 56.2(3) . 5_665 ? 
O13 C1 O12 125.6(4) . 5_665 ? 
O13 C1 O12 17.4(4) 1_554 5_665 ? 
O12 C1 O12 123.27(13) . 5_665 ? 
O12 C1 O12 16.7(9) 1_554 5_665 ? 
O10 C1 O12 136.75(16) . 5_665 ? 
O10 C1 O12 39.2(5) 1_554 5_665 ? 
O11 C1 O12 62.2(5) 5_655 5_665 ? 
O11 C1 O12 139.7(2) . 5_665 ? 
O12 C1 O12 111.1(6) 5_666 5_665 ? 
N2 C2 C2 121.94(17) . 6_556 ? 
N2 C2 O13 132.7(3) . . ? 
C2 C2 O13 78.33(8) 6_556 . ? 
N2 C2 O13 132.7(3) . 5_566 ? 
C2 C2 O13 78.33(8) 6_556 5_566 ? 
O13 C2 O13 90.6(6) . 5_566 ? 
N2 C2 O10 99.5(2) . . ? 
C2 C2 O10 78.95(4) 6_556 . ? 
O13 C2 O10 38.3(4) . . ? 
O13 C2 O10 127.4(4) 5_566 . ? 
N2 C2 O10 99.5(2) . 1_455 ? 
C2 C2 O10 78.95(4) 6_556 1_455 ? 
O13 C2 O10 127.4(4) . 1_455 ? 
O13 C2 O10 38.3(4) 5_566 1_455 ? 
O10 C2 O10 156.3(2) . 1_455 ? 
N2 C2 O11 76.2(2) . 1_455 ? 
C2 C2 O11 87.9(4) 6_556 1_455 ? 
O13 C2 O11 150.9(4) . 1_455 ? 
O13 C2 O11 61.3(3) 5_566 1_455 ? 
O10 C2 O11 161.3(3) . 1_455 ? 
O10 C2 O11 23.6(3) 1_455 1_455 ? 
N2 C2 O11 76.2(2) . . ? 
C2 C2 O11 87.9(4) 6_556 . ? 
O13 C2 O11 61.3(3) . . ? 
O13 C2 O11 150.9(4) 5_566 . ? 
O10 C2 O11 23.6(3) . . ? 
O10 C2 O11 161.3(3) 1_455 . ? 
O11 C2 O11 144.39(13) 1_455 . ? 
N2 C2 O11 85.7(2) . 5_656 ? 
C2 C2 O11 71.4(3) 6_556 5_656 ? 
O13 C2 O11 59.2(3) . 5_656 ? 
O13 C2 O11 140.5(4) 5_566 5_656 ? 
O10 C2 O11 22.6(3) . 5_656 ? 
O10 C2 O11 147.5(3) 1_455 5_656 ? 
O11 C2 O11 139.52(10) 1_455 5_656 ? 
O11 C2 O11 16.6(7) . 5_656 ? 
N2 C2 O11 85.7(2) . 5_556 ? 
C2 C2 O11 71.4(3) 6_556 5_556 ? 
O13 C2 O11 140.5(4) . 5_556 ? 
O13 C2 O11 59.2(3) 5_566 5_556 ? 
O10 C2 O11 147.5(3) . 5_556 ? 
O10 C2 O11 22.6(3) 1_455 5_556 ? 
O11 C2 O11 16.6(7) 1_455 5_556 ? 
O11 C2 O11 139.52(10) . 5_556 ? 
O11 C2 O11 129.1(5) 5_656 5_556 ? 
N2 C2 O12 117.1(4) . . ? 
C2 C2 O12 80.00(5) 6_556 . ? 
O13 C2 O12 17.4(5) . . ? 
O13 C2 O12 107.8(5) 5_566 . ? 
O10 C2 O12 21.1(5) . . ? 
O10 C2 O12 143.4(4) 1_455 . ? 
O11 C2 O12 165.5(4) 1_455 . ? 
O11 C2 O12 43.9(4) . . ? 
O11 C2 O12 42.9(4) 5_656 . ? 
O11 C2 O12 150.3(4) 5_556 . ? 
N2 C2 O12 117.1(4) . 1_455 ? 
C2 C2 O12 80.00(5) 6_556 1_455 ? 
O13 C2 O12 107.8(5) . 1_455 ? 
O13 C2 O12 17.4(5) 5_566 1_455 ? 
O10 C2 O12 143.4(4) . 1_455 ? 
O10 C2 O12 21.1(5) 1_455 1_455 ? 
O11 C2 O12 43.9(4) 1_455 1_455 ? 
O11 C2 O12 165.5(4) . 1_455 ? 
O11 C2 O12 150.3(4) 5_656 1_455 ? 
O11 C2 O12 42.9(4) 5_556 1_455 ? 
O12 C2 O12 124.9(8) . 1_455 ? 
N2 C2 H2 119.0 . . ? 
C2 C2 H2 119.0 6_556 . ? 
O13 C2 H2 60.6 . . ? 
O13 C2 H2 60.6 5_566 . ? 
O10 C2 H2 91.6 . . ? 
O10 C2 H2 91.6 1_455 . ? 
O11 C2 H2 106.4 1_455 . ? 
O11 C2 H2 106.4 . . ? 
O11 C2 H2 114.0 5_656 . ? 
O11 C2 H2 114.0 5_556 . ? 
O12 C2 H2 73.1 . . ? 
O12 C2 H2 73.1 1_455 . ? 
  
_diffrn_measured_fraction_theta_max    0.973 
_diffrn_reflns_theta_full              25.00 
_diffrn_measured_fraction_theta_full   0.961 
_refine_diff_density_max    1.039 
_refine_diff_density_min   -0.550 
_refine_diff_density_rms    0.162 
#END

 
 
data_1.2H2O(150t)
  
_audit_creation_method            SHELXL-97 
_chemical_name_systematic 
; 
 ? 
; 
_chemical_name_common             '[Fe(pz)Ni(CN)4].2H2O' 
_chemical_melting_point           ? 
_chemical_formula_moiety          'C8 H8 Fe N6 Ni O2' 
_chemical_formula_sum 
 'C8 H8 Fe N6 Ni O2' 
_chemical_formula_weight          334.76 
  
loop_ 
 _atom_type_symbol 
 _atom_type_description 
 _atom_type_scat_dispersion_real 
 _atom_type_scat_dispersion_imag 
 _atom_type_scat_source 
 'C'  'C'   0.0033   0.0016 
 'International Tables Vol C Tables 4.2.6.8 and 6.1.1.4' 
 'H'  'H'   0.0000   0.0000 
 'International Tables Vol C Tables 4.2.6.8 and 6.1.1.4' 
 'N'  'N'   0.0061   0.0033 
 'International Tables Vol C Tables 4.2.6.8 and 6.1.1.4' 
 'O'  'O'   0.0106   0.0060 
 'International Tables Vol C Tables 4.2.6.8 and 6.1.1.4' 
 'Fe'  'Fe'   0.3463   0.8444 
 'International Tables Vol C Tables 4.2.6.8 and 6.1.1.4' 
 'Ni'  'Ni'   0.3393   1.1124 
 'International Tables Vol C Tables 4.2.6.8 and 6.1.1.4' 
  
_symmetry_cell_setting            Orthorhombic 
_symmetry_space_group_name_H-M    Pmmm 
  
loop_ 
 _symmetry_equiv_pos_as_xyz 
 'x, y, z' 
 '-x, -y, z' 
 'x, -y, -z' 
 '-x, y, -z' 
 '-x, -y, -z' 
 'x, y, -z' 
 '-x, y, z' 
 'x, -y, z' 
  
_cell_length_a                    7.028(3) 
_cell_length_b                    7.010(3) 
_cell_length_c                    6.725(2) 
_cell_angle_alpha                 90.00 
_cell_angle_beta                  90.00 
_cell_angle_gamma                 90.00 
_cell_volume                      331.3(2) 
_cell_formula_units_Z             1 
_cell_measurement_temperature     150(2) 
_cell_measurement_reflns_used     770 
_cell_measurement_theta_min       2.8985 
_cell_measurement_theta_max       29.7795 
  
_exptl_crystal_description        'rectangular block' 
_exptl_crystal_colour             red-yellow 
_exptl_crystal_size_max           0.079 
_exptl_crystal_size_mid           0.032 
_exptl_crystal_size_min           0.016 
_exptl_crystal_density_meas       ? 
_exptl_crystal_density_diffrn     1.678 
_exptl_crystal_density_method     'not measured' 
_exptl_crystal_F_000              168 
_exptl_absorpt_coefficient_mu     2.517 
_exptl_absorpt_correction_type    'multi-scan' 
_exptl_absorpt_correction_T_min   0.908 
_exptl_absorpt_correction_T_max   0.961 
_exptl_absorpt_process_details    'SADABS (Bruker-AXS, 2004)' 
  
_exptl_special_details 
; 
In a thin smear of grease in an open ended Kapton capillary 
; 
  
_diffrn_ambient_temperature       150(2) 
_diffrn_radiation_wavelength      0.71073 
_diffrn_radiation_type            MoK\a 
_diffrn_radiation_source          'fine-focus rotating anode' 
_diffrn_radiation_monochromator   graphite 
_diffrn_measurement_device_type   'Bruker-Nonius FR591 Kappa APEX II' 
_diffrn_measurement_method        'phi and omega scans' 
_diffrn_detector_area_resol_mean  ? 
_diffrn_standards_number          0 
_diffrn_standards_interval_count  ? 
_diffrn_standards_interval_time   ? 
_diffrn_standards_decay_%         ? 
_diffrn_reflns_number             1935 
_diffrn_reflns_av_R_equivalents   0.0193 
_diffrn_reflns_av_sigmaI/netI     0.0296 
_diffrn_reflns_limit_h_min        -8 
_diffrn_reflns_limit_h_max        9 
_diffrn_reflns_limit_k_min        -5 
_diffrn_reflns_limit_k_max        9 
_diffrn_reflns_limit_l_min        -9 
_diffrn_reflns_limit_l_max        7 
_diffrn_reflns_theta_min          2.91 
_diffrn_reflns_theta_max          30.13 
_reflns_number_total              561 
_reflns_number_gt                 375 
_reflns_threshold_expression      >2sigma(I) 
  
_computing_data_collection        'APEX2 Ver. 2.1-3 (Bruker-AXS, 2007)' 
_computing_cell_refinement        'SAINT Ver. 7.23A  (Bruker-AXS, 2005)' 
_computing_data_reduction         'SAINT Ver. 7.23A' 
_computing_structure_solution     'SHELXS-97 (Sheldrick, 1990)' 
_computing_structure_refinement   'SHELXL-97 (Sheldrick, 1997)' 
_computing_molecular_graphics     'XPMA/ZORTEP, WebLab Viewer 3.7' 
_computing_publication_material   'CIFTAB' 
  
  
_refine_special_details 
; 
 Refinement of F^2^ against ALL reflections.  The weighted R-factor wR and 
 goodness of fit S are based on F^2^, conventional R-factors R are based 
 on F, with F set to zero for negative F^2^. The threshold expression of 
 F^2^ > 2sigma(F^2^) is used only for calculating R-factors(gt) etc. and is 
 not relevant to the choice of reflections for refinement.  R-factors based 
 on F^2^ are statistically about twice as large as those based on F, and R- 
 factors based on ALL data will be even larger. 
; 
  
_refine_ls_structure_factor_coef  Fsqd 
_refine_ls_matrix_type            full 
_refine_ls_weighting_scheme       calc 
_refine_ls_weighting_details 
 'calc w=1/[\s^2^(Fo^2^)+(0.0337P)^2^+0.8534P] where P=(Fo^2^+2Fc^2^)/3' 
_atom_sites_solution_primary      direct 
_atom_sites_solution_secondary    difmap 
_atom_sites_solution_hydrogens    geom 
_refine_ls_hydrogen_treatment     constr 
_refine_ls_extinction_method      none 
_refine_ls_extinction_coef        ? 
_refine_ls_number_reflns          561 
_refine_ls_number_parameters      36 
_refine_ls_number_restraints      1 
_refine_ls_R_factor_all           0.0688 
_refine_ls_R_factor_gt            0.0362 
_refine_ls_wR_factor_ref          0.0943 
_refine_ls_wR_factor_gt           0.0779 
_refine_ls_goodness_of_fit_ref    1.153 
_refine_ls_restrained_S_all       1.152 
_refine_ls_shift/su_max           0.020 
_refine_ls_shift/su_mean          0.001 
  
loop_ 
 _atom_site_label 
 _atom_site_type_symbol 
 _atom_site_fract_x 
 _atom_site_fract_y 
 _atom_site_fract_z 
 _atom_site_U_iso_or_equiv 
 _atom_site_adp_type 
 _atom_site_occupancy 
 _atom_site_symmetry_multiplicity 
 _atom_site_calc_flag 
 _atom_site_refinement_flags 
 _atom_site_disorder_assembly 
 _atom_site_disorder_group 
Ni1 Ni 0.5000 0.5000 0.0000 0.0100(3) Uani 1 8 d S . . 
Fe1 Fe 0.0000 0.0000 0.0000 0.0084(3) Uani 1 8 d S . . 
O10 O 0.5000 0.2039 0.5000 0.209(17) Uiso 0.100(4) 4 d SP . . 
O11 O 0.5000 0.0000 0.4164 0.209(17) Uiso 0.15(3) 4 d SP . . 
O12 O 0.5000 0.4150 0.5000 0.209(17) Uiso 0.39(2) 4 d SP . . 
N1 N 0.1951(12) 0.1969(14) 0.0000 0.0119(9) Uani 1 2 d S . . 
N2 N 0.0000 0.0000 0.2931(7) 0.0120(10) Uani 1 4 d S . . 
C1 C 0.3135(15) 0.3104(17) 0.0000 0.0123(11) Uani 1 2 d S . . 
C2 C 0.0000 0.1636(10) 0.3978(9) 0.0213(13) Uani 1 2 d S . . 
H2 H 0.0000 0.2818 0.3289 0.026 Uiso 1 2 calc SR . . 
O13 O 0.153(8) 0.5000 0.5000 0.209(17) Uiso 0.36(3) 4 d SP . . 
  
loop_ 
 _atom_site_aniso_label 
 _atom_site_aniso_U_11 
 _atom_site_aniso_U_22 
 _atom_site_aniso_U_33 
 _atom_site_aniso_U_23 
 _atom_site_aniso_U_13 
 _atom_site_aniso_U_12 
Ni1 0.004(2) 0.010(2) 0.0159(6) 0.000 0.000 0.000 
Fe1 0.003(2) 0.012(2) 0.0107(6) 0.000 0.000 0.000 
N1 0.004(4) 0.017(5) 0.0152(19) 0.000 0.000 0.0000(18) 
N2 0.013(7) 0.011(7) 0.011(2) 0.000 0.000 0.000 
C1 0.007(5) 0.018(7) 0.012(2) 0.000 0.000 0.004(2) 
C2 0.029(4) 0.011(4) 0.024(3) 0.000(3) 0.000 0.000 
  
_geom_special_details 
; 
 All esds (except the esd in the dihedral angle between two l.s. planes) 
 are estimated using the full covariance matrix.  The cell esds are taken 
 into account individually in the estimation of esds in distances, angles 
 and torsion angles; correlations between esds in cell parameters are only 
 used when they are defined by crystal symmetry.  An approximate (isotropic) 
 treatment of cell esds is used for estimating esds involving l.s. planes. 
; 
  
loop_ 
 _geom_bond_atom_site_label_1 
 _geom_bond_atom_site_label_2 
 _geom_bond_distance 
 _geom_bond_site_symmetry_2 
 _geom_bond_publ_flag 
Ni1 C1 1.866(6) 5_665 ? 
Ni1 C1 1.866(6) . ? 
Ni1 C1 1.866(6) 7_655 ? 
Ni1 C1 1.866(6) 3_565 ? 
Fe1 N1 1.946(5) 5 ? 
Fe1 N1 1.946(5) . ? 
Fe1 N1 1.946(5) 3 ? 
Fe1 N1 1.946(5) 7 ? 
Fe1 N2 1.971(5) 5 ? 
Fe1 N2 1.971(5) . ? 
O10 O12 1.4803(6) . ? 
O10 O11 1.5356(5) . ? 
O10 O11 1.5356(5) 5_656 ? 
O11 O11 1.1241(4) 5_656 ? 
O11 O10 1.5356(5) 5_656 ? 
O12 O12 1.1913(5) 5_666 ? 
N1 C1 1.151(5) . ? 
N2 C2 1.345(7) . ? 
N2 C2 1.345(7) 2 ? 
C2 C2 1.374(12) 6_556 ? 
C2 H2 0.9500 . ? 
  
loop_ 
 _geom_angle_atom_site_label_1 
 _geom_angle_atom_site_label_2 
 _geom_angle_atom_site_label_3 
 _geom_angle 
 _geom_angle_site_symmetry_1 
 _geom_angle_site_symmetry_3 
 _geom_angle_publ_flag 
C1 Ni1 C1 180.0 5_665 . ? 
C1 Ni1 C1 90.8(9) 5_665 7_655 ? 
C1 Ni1 C1 89.2(9) . 7_655 ? 
C1 Ni1 C1 89.2(9) 5_665 3_565 ? 
C1 Ni1 C1 90.8(9) . 3_565 ? 
C1 Ni1 C1 180.000(1) 7_655 3_565 ? 
N1 Fe1 N1 180.0 5 . ? 
N1 Fe1 N1 89.6(7) 5 3 ? 
N1 Fe1 N1 90.4(7) . 3 ? 
N1 Fe1 N1 90.4(7) 5 7 ? 
N1 Fe1 N1 89.6(7) . 7 ? 
N1 Fe1 N1 180.0(3) 3 7 ? 
N1 Fe1 N2 90.0 5 5 ? 
N1 Fe1 N2 90.0 . 5 ? 
N1 Fe1 N2 90.0 3 5 ? 
N1 Fe1 N2 90.0 7 5 ? 
N1 Fe1 N2 90.0 5 . ? 
N1 Fe1 N2 90.0 . . ? 
N1 Fe1 N2 90.0 3 . ? 
N1 Fe1 N2 90.0 7 . ? 
N2 Fe1 N2 180.0 5 . ? 
O12 O10 O11 158.531(10) . . ? 
O12 O10 O11 158.531(10) . 5_656 ? 
O11 O10 O11 42.94(2) . 5_656 ? 
O11 O11 O10 68.531(10) 5_656 . ? 
O11 O11 O10 68.531(10) 5_656 5_656 ? 
O10 O11 O10 137.06(2) . 5_656 ? 
O12 O12 O10 180.0 5_666 . ? 
C1 N1 Fe1 178.5(15) . . ? 
C2 N2 C2 116.9(6) . 2 ? 
C2 N2 Fe1 121.6(3) . . ? 
C2 N2 Fe1 121.6(3) 2 . ? 
N1 C1 Ni1 178.3(16) . . ? 
N2 C2 C2 121.6(3) . 6_556 ? 
N2 C2 H2 119.2 . . ? 
C2 C2 H2 119.2 6_556 . ? 
  
_diffrn_measured_fraction_theta_max    0.927 
_diffrn_reflns_theta_full              25.00 
_diffrn_measured_fraction_theta_full   0.950 
_refine_diff_density_max    1.032 
_refine_diff_density_min   -0.754 
_refine_diff_density_rms    0.135  
#END

 
data_1.2H2O(300t) 

_audit_creation_method            SHELXL-97 
_chemical_name_systematic 
; 
 ? 
; 
_chemical_name_common             '[Fe(pz)Ni(CN)4].2H2O' 
_chemical_melting_point           ? 
_chemical_formula_moiety          ? 
_chemical_formula_sum 
 'C8 H8 Fe N6 Ni O2' 
_chemical_formula_weight          334.76 
  
loop_ 
 _atom_type_symbol 
 _atom_type_description 
 _atom_type_scat_dispersion_real 
 _atom_type_scat_dispersion_imag 
 _atom_type_scat_source 
 'C'  'C'   0.0033   0.0016 
 'International Tables Vol C Tables 4.2.6.8 and 6.1.1.4' 
 'H'  'H'   0.0000   0.0000 
 'International Tables Vol C Tables 4.2.6.8 and 6.1.1.4' 
 'N'  'N'   0.0061   0.0033 
 'International Tables Vol C Tables 4.2.6.8 and 6.1.1.4' 
 'O'  'O'   0.0106   0.0060 
 'International Tables Vol C Tables 4.2.6.8 and 6.1.1.4' 
 'Fe'  'Fe'   0.3463   0.8444 
 'International Tables Vol C Tables 4.2.6.8 and 6.1.1.4' 
 'Ni'  'Ni'   0.3393   1.1124 
 'International Tables Vol C Tables 4.2.6.8 and 6.1.1.4' 
  
_symmetry_cell_setting            Orthorhombic 
_symmetry_space_group_name_H-M    Pmmm 
  
loop_ 
 _symmetry_equiv_pos_as_xyz 
 'x, y, z' 
 '-x, -y, z' 
 'x, -y, -z' 
 '-x, y, -z' 
 '-x, -y, -z' 
 'x, y, -z' 
 '-x, y, z' 
 'x, -y, z' 
  
_cell_length_a                    7.2666(3) 
_cell_length_b                    7.2696(3) 
_cell_length_c                    7.2421(3) 
_cell_angle_alpha                 90.00 
_cell_angle_beta                  90.00 
_cell_angle_gamma                 90.00 
_cell_volume                      382.57(3) 
_cell_formula_units_Z             1 
_cell_measurement_temperature     301(2) 
_cell_measurement_reflns_used     1599 
_cell_measurement_theta_min       2.802 
_cell_measurement_theta_max       29.9535 
  
_exptl_crystal_description        'rectangular block' 
_exptl_crystal_colour             red-yellow 
_exptl_crystal_size_max           0.079 
_exptl_crystal_size_mid           0.032 
_exptl_crystal_size_min           0.016 
_exptl_crystal_density_meas       ? 
_exptl_crystal_density_diffrn     1.453 
_exptl_crystal_density_method     'not measured' 
_exptl_crystal_F_000              168 
_exptl_absorpt_coefficient_mu     2.180 
_exptl_absorpt_correction_type    'multi-scan' 
_exptl_absorpt_correction_T_min   0.920 
_exptl_absorpt_correction_T_max   0.966 
_exptl_absorpt_process_details    'SADABS (Bruker-AXS, 2004)' 
  
_exptl_special_details 
; 
In a thin smear of grease in an open ended Kapton capillary 
; 
  
_diffrn_ambient_temperature       301(2) 
_diffrn_radiation_wavelength      0.71073 
_diffrn_radiation_type            MoK\a 
_diffrn_radiation_source          'fine-focus rotating anode' 
_diffrn_radiation_monochromator   graphite 
_diffrn_measurement_device_type   'Bruker-Nonius FR591 Kappa APEX II' 
_diffrn_measurement_method        'phi and omega scans' 
_diffrn_detector_area_resol_mean  ? 
_diffrn_standards_number          0 
_diffrn_standards_interval_count  ? 
_diffrn_standards_interval_time   ? 
_diffrn_standards_decay_%         ? 
_diffrn_reflns_number             3451 
_diffrn_reflns_av_R_equivalents   0.0190 
_diffrn_reflns_av_sigmaI/netI     0.0186 
_diffrn_reflns_limit_h_min        -9 
_diffrn_reflns_limit_h_max        10 
_diffrn_reflns_limit_k_min        -10 
_diffrn_reflns_limit_k_max        10 
_diffrn_reflns_limit_l_min        -10 
_diffrn_reflns_limit_l_max        8 
_diffrn_reflns_theta_min          2.80 
_diffrn_reflns_theta_max          30.08 
_reflns_number_total              688 
_reflns_number_gt                 526 
_reflns_threshold_expression      >2sigma(I) 
  
_computing_data_collection        'APEX2 Ver. 2.1-3 (Bruker-AXS, 2007)' 
_computing_cell_refinement        'SAINT Ver. 7.23A  (Bruker-AXS, 2005)' 
_computing_data_reduction         'SAINT Ver. 7.23A' 
_computing_structure_solution     'SHELXS-97 (Sheldrick, 1990)' 
_computing_structure_refinement   'SHELXL-97 (Sheldrick, 1997)' 
_computing_molecular_graphics     'XPMA/ZORTEP, WebLab Viewer 3.7'
_computing_publication_material   'CIFTAB' 
  
  
_refine_special_details 
; 
 Refinement of F^2^ against ALL reflections.  The weighted R-factor wR and 
 goodness of fit S are based on F^2^, conventional R-factors R are based 
 on F, with F set to zero for negative F^2^. The threshold expression of 
 F^2^ > 2sigma(F^2^) is used only for calculating R-factors(gt) etc. and is 
 not relevant to the choice of reflections for refinement.  R-factors based 
 on F^2^ are statistically about twice as large as those based on F, and R- 
 factors based on ALL data will be even larger. 
; 
  
_refine_ls_structure_factor_coef  Fsqd 
_refine_ls_matrix_type            full 
_refine_ls_weighting_scheme       calc 
_refine_ls_weighting_details 
 'calc w=1/[\s^2^(Fo^2^)+(0.0449P)^2^+0.7689P] where P=(Fo^2^+2Fc^2^)/3' 
_atom_sites_solution_primary      direct 
_atom_sites_solution_secondary    difmap 
_atom_sites_solution_hydrogens    geom 
_refine_ls_hydrogen_treatment     constr 
_refine_ls_extinction_method      none 
_refine_ls_extinction_coef        ? 
_refine_ls_number_reflns          688 
_refine_ls_number_parameters      37 
_refine_ls_number_restraints      1 
_refine_ls_R_factor_all           0.0541 
_refine_ls_R_factor_gt            0.0393 
_refine_ls_wR_factor_ref          0.1200 
_refine_ls_wR_factor_gt           0.1083 
_refine_ls_goodness_of_fit_ref    1.227 
_refine_ls_restrained_S_all       1.226 
_refine_ls_shift/su_max           0.001 
_refine_ls_shift/su_mean          0.000 
  
loop_ 
 _atom_site_label 
 _atom_site_type_symbol 
 _atom_site_fract_x 
 _atom_site_fract_y 
 _atom_site_fract_z 
 _atom_site_U_iso_or_equiv 
 _atom_site_adp_type 
 _atom_site_occupancy 
 _atom_site_symmetry_multiplicity 
 _atom_site_calc_flag 
 _atom_site_refinement_flags 
 _atom_site_disorder_assembly 
 _atom_site_disorder_group 
Ni1 Ni 0.5000 0.5000 0.0000 0.0220(3) Uani 1 8 d S . . 
Fe1 Fe 0.0000 0.0000 0.0000 0.0192(3) Uani 1 8 d S . . 
O11 O 0.5000 0.0000 0.399(11) 0.176(14) Uiso 0.272(4) 4 d SP . . 
O12 O 0.5000 0.401(5) 0.5000 0.176(14) Uiso 0.53(2) 4 d SP . . 
O13 O 0.5000 0.5000 0.323(13) 0.176(14) Uiso 0.19(2) 4 d SP . . 
N1 N 0.2051(14) 0.2088(11) 0.0000 0.0327(10) Uani 1 2 d S . . 
N2 N 0.0000 0.0000 0.3073(8) 0.0336(14) Uani 1 4 d S . . 
C1 C 0.3243(15) 0.3120(16) 0.0000 0.0253(10) Uani 1 2 d S . . 
C2 C 0.0000 0.1544(11) 0.4031(12) 0.075(3) Uani 1 2 d S . . 
H2 H 0.0000 0.2661 0.3406 0.090 Uiso 1 2 calc SR . . 
  
loop_ 
 _atom_site_aniso_label 
 _atom_site_aniso_U_11 
 _atom_site_aniso_U_22 
 _atom_site_aniso_U_33 
 _atom_site_aniso_U_23 
 _atom_site_aniso_U_13 
 _atom_site_aniso_U_12 
Ni1 0.0102(15) 0.0122(17) 0.0438(7) 0.000 0.000 0.000 
Fe1 0.0078(16) 0.018(2) 0.0322(6) 0.000 0.000 0.000 
N1 0.044(4) 0.005(2) 0.050(2) 0.000 0.000 -0.0054(14) 
N2 0.050(7) 0.015(5) 0.036(3) 0.000 0.000 0.000 
C1 0.020(4) 0.013(3) 0.043(2) 0.000 0.000 0.0038(19) 
C2 0.143(10) 0.025(3) 0.055(4) -0.001(3) 0.000 0.000 
  
_geom_special_details 
; 
 All esds (except the esd in the dihedral angle between two l.s. planes) 
 are estimated using the full covariance matrix.  The cell esds are taken 
 into account individually in the estimation of esds in distances, angles 
 and torsion angles; correlations between esds in cell parameters are only 
 used when they are defined by crystal symmetry.  An approximate (isotropic) 
 treatment of cell esds is used for estimating esds involving l.s. planes. 
; 
  
loop_ 
 _geom_bond_atom_site_label_1 
 _geom_bond_atom_site_label_2 
 _geom_bond_distance 
 _geom_bond_site_symmetry_2 
 _geom_bond_publ_flag 
Ni1 C1 1.870(5) 5_665 ? 
Ni1 C1 1.870(5) . ? 
Ni1 C1 1.870(5) 7_655 ? 
Ni1 C1 1.870(5) 3_565 ? 
Ni1 O13 2.34(10) . ? 
Ni1 O13 2.34(10) 5_665 ? 
Fe1 N1 2.128(4) 5 ? 
Fe1 N1 2.128(4) . ? 
Fe1 N1 2.128(4) 7 ? 
Fe1 N1 2.128(4) 3 ? 
Fe1 N2 2.226(6) . ? 
Fe1 N2 2.226(6) 5 ? 
O11 O11 1.46(16) 5_656 ? 
O12 O12 1.44(8) 5_666 ? 
O12 O13 1.47(8) 5_666 ? 
O12 O13 1.47(8) . ? 
O13 O12 1.47(8) 5_666 ? 
N1 C1 1.145(7) . ? 
N2 C2 1.319(8) . ? 
N2 C2 1.319(8) 2 ? 
C2 C2 1.403(17) 6_556 ? 
C2 H2 0.9300 . ? 
  
loop_ 
 _geom_angle_atom_site_label_1 
 _geom_angle_atom_site_label_2 
 _geom_angle_atom_site_label_3 
 _geom_angle 
 _geom_angle_site_symmetry_1 
 _geom_angle_site_symmetry_3 
 _geom_angle_publ_flag 
C1 Ni1 C1 180.000(1) 5_665 . ? 
C1 Ni1 C1 93.9(9) 5_665 7_655 ? 
C1 Ni1 C1 86.1(9) . 7_655 ? 
C1 Ni1 C1 86.1(9) 5_665 3_565 ? 
C1 Ni1 C1 93.9(9) . 3_565 ? 
C1 Ni1 C1 180.000(1) 7_655 3_565 ? 
C1 Ni1 O13 90.000(3) 5_665 . ? 
C1 Ni1 O13 90.000(3) . . ? 
C1 Ni1 O13 90.000(3) 7_655 . ? 
C1 Ni1 O13 90.000(3) 3_565 . ? 
C1 Ni1 O13 90.000(3) 5_665 5_665 ? 
C1 Ni1 O13 90.000(3) . 5_665 ? 
C1 Ni1 O13 90.000(3) 7_655 5_665 ? 
C1 Ni1 O13 90.000(3) 3_565 5_665 ? 
O13 Ni1 O13 180.000(2) . 5_665 ? 
N1 Fe1 N1 180.0(3) 5 . ? 
N1 Fe1 N1 91.0(6) 5 7 ? 
N1 Fe1 N1 89.0(6) . 7 ? 
N1 Fe1 N1 89.0(6) 5 3 ? 
N1 Fe1 N1 91.0(6) . 3 ? 
N1 Fe1 N1 180.0 7 3 ? 
N1 Fe1 N2 90.0 5 . ? 
N1 Fe1 N2 90.0 . . ? 
N1 Fe1 N2 90.0 7 . ? 
N1 Fe1 N2 90.0 3 . ? 
N1 Fe1 N2 90.0 5 5 ? 
N1 Fe1 N2 90.0 . 5 ? 
N1 Fe1 N2 90.0 7 5 ? 
N1 Fe1 N2 90.0 3 5 ? 
N2 Fe1 N2 180.0 . 5 ? 
O12 O12 O13 61(3) 5_666 5_666 ? 
O12 O12 O13 61(3) 5_666 . ? 
O13 O12 O13 121(5) 5_666 . ? 
O12 O13 O12 59(5) 5_666 . ? 
O12 O13 Ni1 151(3) 5_666 . ? 
O12 O13 Ni1 151(3) . . ? 
C1 N1 Fe1 175.4(15) . . ? 
C2 N2 C2 116.6(8) . 2 ? 
C2 N2 Fe1 121.7(4) . . ? 
C2 N2 Fe1 121.7(4) 2 . ? 
N1 C1 Ni1 173.9(17) . . ? 
N2 C2 C2 121.7(4) . 6_556 ? 
N2 C2 H2 119.1 . . ? 
C2 C2 H2 119.1 6_556 . ? 
  
_diffrn_measured_fraction_theta_max    0.991 
_diffrn_reflns_theta_full              30.08 
_diffrn_measured_fraction_theta_full   0.991 
_refine_diff_density_max    1.422 
_refine_diff_density_min   -0.621 
_refine_diff_density_rms    0.130 
#END

 
data_1(375) 

_audit_creation_method            SHELXL-97 
_chemical_name_systematic 
; 
 ? 
; 
_chemical_name_common             '[Fe(pz)Ni(CN)4]' 
_chemical_melting_point           ? 
_chemical_formula_moiety          'C8 H4 Fe N6 Ni' 
_chemical_formula_sum 
 'C8 H4 Fe N6 Ni' 
_chemical_formula_weight          298.73 
  
loop_ 
 _atom_type_symbol 
 _atom_type_description 
 _atom_type_scat_dispersion_real 
 _atom_type_scat_dispersion_imag 
 _atom_type_scat_source 
 'C'  'C'   0.0033   0.0016 
 'International Tables Vol C Tables 4.2.6.8 and 6.1.1.4' 
 'H'  'H'   0.0000   0.0000 
 'International Tables Vol C Tables 4.2.6.8 and 6.1.1.4' 
 'N'  'N'   0.0061   0.0033 
 'International Tables Vol C Tables 4.2.6.8 and 6.1.1.4' 
 'Fe'  'Fe'   0.3463   0.8444 
 'International Tables Vol C Tables 4.2.6.8 and 6.1.1.4' 
 'Ni'  'Ni'   0.3393   1.1124 
 'International Tables Vol C Tables 4.2.6.8 and 6.1.1.4' 
  
_symmetry_cell_setting            Tetragonal 
_symmetry_space_group_name_H-M    P4/mmm 
  
loop_ 
 _symmetry_equiv_pos_as_xyz 
 'x, y, z' 
 '-y, x, z' 
 '-x, -y, z' 
 'y, -x, z' 
 'x, -y, -z' 
 '-x, y, -z' 
 'y, x, -z' 
 '-y, -x, -z' 
 '-x, -y, -z' 
 'y, -x, -z' 
 'x, y, -z' 
 '-y, x, -z' 
 '-x, y, z' 
 'x, -y, z' 
 '-y, -x, z' 
 'y, x, z' 
  
_cell_length_a                    7.2574(13) 
_cell_length_b                    7.2574(13) 
_cell_length_c                    7.256(3) 
_cell_angle_alpha                 90.00 
_cell_angle_beta                  90.00 
_cell_angle_gamma                 90.00 
_cell_volume                      382.17(17) 
_cell_formula_units_Z             1 
_cell_measurement_temperature     375(2) 
_cell_measurement_reflns_used     930 
_cell_measurement_theta_min       2.807 
_cell_measurement_theta_max       29.473 
  
_exptl_crystal_description        'rectangular block' 
_exptl_crystal_colour             'yellow-red' 
_exptl_crystal_size_max           0.079 
_exptl_crystal_size_mid           0.048 
_exptl_crystal_size_min           0.032 
_exptl_crystal_density_meas       ? 
_exptl_crystal_density_diffrn     1.298 
_exptl_crystal_density_method     'not measured' 
_exptl_crystal_F_000              148 
_exptl_absorpt_coefficient_mu     2.164 
_exptl_absorpt_correction_type    'multi-scan' 
_exptl_absorpt_correction_T_min   0.840 
_exptl_absorpt_correction_T_max   0.933 
_exptl_absorpt_process_details    'SADABS (Bruker-AXS, 2004)' 
  
_exptl_special_details 
; 
  In a thin film of grease in a Kapton capillary 
; 
  
_diffrn_ambient_temperature       375(2) 
_diffrn_radiation_wavelength      0.71073 
_diffrn_radiation_type            MoK\a 
_diffrn_radiation_source          'fine-focus rotating anode' 
_diffrn_radiation_monochromator   graphite 
_diffrn_measurement_device_type   'Bruker-Nonius FR591 Kappa APEX II' 
_diffrn_measurement_method        'phi and omega scans' 
_diffrn_detector_area_resol_mean  ? 
_diffrn_standards_number          0 
_diffrn_standards_interval_count  ? 
_diffrn_standards_interval_time   ? 
_diffrn_standards_decay_%         ? 
_diffrn_reflns_number             2959 
_diffrn_reflns_av_R_equivalents   0.0438 
_diffrn_reflns_av_sigmaI/netI     0.0688 
_diffrn_reflns_limit_h_min        -10 
_diffrn_reflns_limit_h_max        10 
_diffrn_reflns_limit_k_min        -10 
_diffrn_reflns_limit_k_max        10 
_diffrn_reflns_limit_l_min        -9 
_diffrn_reflns_limit_l_max        10 
_diffrn_reflns_theta_min          3.97 
_diffrn_reflns_theta_max          30.59 
_reflns_number_total              365 
_reflns_number_gt                 209 
_reflns_threshold_expression      >2sigma(I) 
  
_computing_data_collection        'APEX2 Ver. 2.1-3 (Bruker-AXS, 2007)' 
_computing_cell_refinement        'SAINT Ver. 7.23A  (Bruker-AXS, 2005)' 
_computing_data_reduction         'SAINT Ver. 7.23A' 
_computing_structure_solution     'SHELXS-97 (Sheldrick, 1990)' 
_computing_structure_refinement   'SHELXL-97 (Sheldrick, 1997)' 
_computing_molecular_graphics     'XPMA/ZORTEP, WebLab Viewer 3.7' 
_computing_publication_material   'CIFTAB'
  
_refine_special_details 
; 
 Refinement of F^2^ against ALL reflections.  The weighted R-factor wR and 
 goodness of fit S are based on F^2^, conventional R-factors R are based 
 on F, with F set to zero for negative F^2^. The threshold expression of 
 F^2^ > 2sigma(F^2^) is used only for calculating R-factors(gt) etc. and is 
 not relevant to the choice of reflections for refinement.  R-factors based 
 on F^2^ are statistically about twice as large as those based on F, and R- 
 factors based on ALL data will be even larger. 
; 
  
_refine_ls_structure_factor_coef  Fsqd 
_refine_ls_matrix_type            full 
_refine_ls_weighting_scheme       calc 
_refine_ls_weighting_details 
 'calc w=1/[\s^2^(Fo^2^)+(0.0649P)^2^+0.0000P] where P=(Fo^2^+2Fc^2^)/3' 
_atom_sites_solution_primary      direct 
_atom_sites_solution_secondary    difmap 
_atom_sites_solution_hydrogens    geom 
_refine_ls_hydrogen_treatment     constr 
_refine_ls_extinction_method      none 
_refine_ls_extinction_coef        ? 
_refine_ls_number_reflns          365 
_refine_ls_number_parameters      22 
_refine_ls_number_restraints      0 
_refine_ls_R_factor_all           0.0969 
_refine_ls_R_factor_gt            0.0464 
_refine_ls_wR_factor_ref          0.1182 
_refine_ls_wR_factor_gt           0.0994 
_refine_ls_goodness_of_fit_ref    0.962 
_refine_ls_restrained_S_all       0.962 
_refine_ls_shift/su_max           0.000 
_refine_ls_shift/su_mean          0.000 
  
loop_ 
 _atom_site_label 
 _atom_site_type_symbol 
 _atom_site_fract_x 
 _atom_site_fract_y 
 _atom_site_fract_z 
 _atom_site_U_iso_or_equiv 
 _atom_site_adp_type 
 _atom_site_occupancy 
 _atom_site_symmetry_multiplicity 
 _atom_site_calc_flag 
 _atom_site_refinement_flags 
 _atom_site_disorder_assembly 
 _atom_site_disorder_group 
Ni1 Ni 0.5000 0.5000 0.0000 0.0252(7) Uani 1 16 d S . . 
Fe1 Fe 0.0000 0.0000 0.0000 0.0244(6) Uani 1 16 d S . . 
N1 N 0.2063(6) 0.2063(6) 0.0000 0.043(2) Uani 1 4 d S . . 
N2 N 0.0000 0.0000 0.3049(16) 0.041(2) Uani 1 8 d S . . 
C1 C 0.3183(6) 0.3183(6) 0.0000 0.034(2) Uani 1 4 d S . . 
C2 C 0.0000 0.1498(12) 0.3985(17) 0.064(4) Uani 0.50 2 d SP . . 
H2 H 0.0000 0.2619 0.3363 0.077 Uiso 0.50 2 calc SPR . . 
  
loop_ 
 _atom_site_aniso_label 
 _atom_site_aniso_U_11 
 _atom_site_aniso_U_22 
 _atom_site_aniso_U_33 
 _atom_site_aniso_U_23 
 _atom_site_aniso_U_13 
 _atom_site_aniso_U_12 
Ni1 0.0141(4) 0.0141(4) 0.0473(19) 0.000 0.000 0.000 
Fe1 0.0153(5) 0.0153(5) 0.0427(19) 0.000 0.000 0.000 
N1 0.0281(15) 0.0281(15) 0.073(7) 0.000 0.000 -0.0074(18) 
N2 0.041(3) 0.041(3) 0.041(7) 0.000 0.000 0.000 
C1 0.0237(16) 0.0237(16) 0.054(7) 0.000 0.000 0.005(2) 
C2 0.084(7) 0.037(5) 0.072(13) 0.026(6) 0.000 0.000 
  
_geom_special_details 
; 
 All esds (except the esd in the dihedral angle between two l.s. planes) 
 are estimated using the full covariance matrix.  The cell esds are taken 
 into account individually in the estimation of esds in distances, angles 
 and torsion angles; correlations between esds in cell parameters are only 
 used when they are defined by crystal symmetry.  An approximate (isotropic) 
 treatment of cell esds is used for estimating esds involving l.s. planes. 
; 
  
loop_ 
 _geom_bond_atom_site_label_1 
 _geom_bond_atom_site_label_2 
 _geom_bond_distance 
 _geom_bond_site_symmetry_2 
 _geom_bond_publ_flag 
Ni1 C1 1.865(6) . ? 
Ni1 C1 1.865(6) 9_665 ? 
Ni1 C1 1.865(6) 10_565 ? 
Ni1 C1 1.865(6) 2_655 ? 
Fe1 N1 2.117(6) . ? 
Fe1 N1 2.117(6) 9 ? 
Fe1 N1 2.117(6) 10 ? 
Fe1 N1 2.117(6) 2 ? 
Fe1 N2 2.213(12) 9 ? 
Fe1 N2 2.213(12) . ? 
N1 C1 1.149(8) . ? 
N2 C2 1.282(11) 4 ? 
N2 C2 1.282(11) . ? 
N2 C2 1.282(11) 2 ? 
N2 C2 1.282(11) 3 ? 
C2 C2 1.47(2) 11_556 ? 
C2 H2 0.9300 . ? 
  
loop_ 
 _geom_angle_atom_site_label_1 
 _geom_angle_atom_site_label_2 
 _geom_angle_atom_site_label_3 
 _geom_angle 
 _geom_angle_site_symmetry_1 
 _geom_angle_site_symmetry_3 
 _geom_angle_publ_flag 
C1 Ni1 C1 180.0 . 9_665 ? 
C1 Ni1 C1 90.0 . 10_565 ? 
C1 Ni1 C1 90.0 9_665 10_565 ? 
C1 Ni1 C1 90.0 . 2_655 ? 
C1 Ni1 C1 90.0 9_665 2_655 ? 
C1 Ni1 C1 180.0 10_565 2_655 ? 
N1 Fe1 N1 180.00(15) . 9 ? 
N1 Fe1 N1 90.0 . 10 ? 
N1 Fe1 N1 90.0 9 10 ? 
N1 Fe1 N1 90.0 . 2 ? 
N1 Fe1 N1 90.0 9 2 ? 
N1 Fe1 N1 180.00(15) 10 2 ? 
N1 Fe1 N2 90.0 . 9 ? 
N1 Fe1 N2 90.0 9 9 ? 
N1 Fe1 N2 90.0 10 9 ? 
N1 Fe1 N2 90.0 2 9 ? 
N1 Fe1 N2 90.0 . . ? 
N1 Fe1 N2 90.0 9 . ? 
N1 Fe1 N2 90.0 10 . ? 
N1 Fe1 N2 90.0 2 . ? 
N2 Fe1 N2 180.0 9 . ? 
C1 N1 Fe1 180.0(4) . . ? 
C2 N2 C2 73.7(7) 4 . ? 
C2 N2 C2 116.0(14) 4 2 ? 
C2 N2 C2 73.7(7) . 2 ? 
C2 N2 C2 73.7(7) 4 3 ? 
C2 N2 C2 116.0(14) . 3 ? 
C2 N2 C2 73.7(7) 2 3 ? 
C2 N2 Fe1 122.0(7) 4 . ? 
C2 N2 Fe1 122.0(7) . . ? 
C2 N2 Fe1 122.0(7) 2 . ? 
C2 N2 Fe1 122.0(7) 3 . ? 
N1 C1 Ni1 180.0(5) . . ? 
N2 C2 C2 122.0(7) . 11_556 ? 
N2 C2 H2 119.0 . . ? 
C2 C2 H2 119.0 11_556 . ? 
  
_diffrn_measured_fraction_theta_max    0.917 
_diffrn_reflns_theta_full              25.00 
_diffrn_measured_fraction_theta_full   0.884 
_refine_diff_density_max    1.189 
_refine_diff_density_min   -0.473 
_refine_diff_density_rms    0.113 
#END
